1  
2  
3  
4  
5  
6  
7  
8  
9  
10  
11  
12  
13  
14  
15  
16  
17  
18  
19  
20  
21  
22  
23  
24  
25

Microbiota of the alien species *Paraleucilla magna* (Porifera, Calcarea) from the Southwestern Atlantic, and a comparison with that of other calcareous sponges

Short title: Microbiota of *P. magna* from the Southwestern Atlantic

Maira Ferreira Lopes<sup>1</sup>, Beatriz Mágn<sup>2</sup>, Michelle Klautau<sup>3</sup>, Eduardo Leal Esteves<sup>2</sup> and Rodolpho M. Albano<sup>1\*</sup>

<sup>1</sup>Universidade do Estado do Rio de Janeiro, Departamento de Bioquímica, IBRAG, Blv. Vinte e Oito de Setembro, 87, fundos 4 andar, Rio de Janeiro, RJ 20551-030, Brazil

<sup>2</sup>Universidade do Estado do Rio de Janeiro, Departamento de Zoologia, IBRAG, Rua São Francisco Xavier, 524, PHLC, Sala 520, Rio de Janeiro, RJ 20550-013, Brazil

<sup>3</sup>Universidade Federal do Rio de Janeiro, Instituto de Biologia, Departamento de Zoologia, Av. Carlos Chagas Filho, 373, 21941-902, Rio de Janeiro, RJ, Brazil.

\*Corresponding author:  
Rodolpho M. Albano  
E-mail: rodolphalb@gmail.com

26

27 Abstract

28 Sponges (Porifera) co-evolved with microorganisms in a well-established symbiotic  
29 relationship. Based on this characteristic, sponges can be separated into high microbial  
30 abundance (HMA) and low microbial abundance (LMA) species. *Paraleucilla magna*  
31 (Calcarea, Porifera) is an alien species of ecological importance in the Brazilian  
32 coastline. Little is known about the composition of its microbiota and that of other  
33 calcareous species, especially those inhabiting the Southwest Atlantic. Here, we  
34 describe the microbiota of *P. magna* and compare it to that of other calcareous sponge  
35 species for which such data exist. *P. magna*'s microbiota shows a lower diversity than  
36 that of *Clathrina clathrus*, *C. coriacea*, *Leucosolenia* sp., *Leuconia* sp. and *Leucetta*  
37 *antarctica*. *P. magna* microbiota is dominated by two bacterial OTUs of the  
38 Alphaproteobacteria class, that could not be classified beyond class (OTU001) and  
39 family levels (OTU002; Rhodospirillaceae). The Thaumarcheota was the predominant  
40 archaeal phylum in *P. magna*, with OTUs mainly affiliated to the genus *Candidatus*  
41 *Nitrosopumilus*. The comparison with other calcareous species showed that microbiota  
42 composition correlated well with sponge phylogenetic affiliation. Metabolic prediction  
43 with PICRUSt software of *P. magna* bacterial microbiota indicated that membrane  
44 transport and carbohydrate, amino acid and energy metabolisms were most abundant  
45 while, for the archaeal domain, pathways related to translation, and energy metabolisms  
46 were predominant. Predicted metabolic features were compared between the different  
47 sponge species and seawater samples, showing that pathways related to cell motility,  
48 membrane transport, genetic information processing, xenobiotics metabolism and signal  
49 transduction are higher in the former while amino acid and nucleotide metabolism,  
50 translation, replication and repair, folding, sorting and degradation and glycan

51 biosynthesis and metabolism are abundant in the latter. This study shows that *P.*  
52 *magna*'s microbiota is typical of an LMA sponge and that it differs from the microbiota  
53 of other calcareous sponges both in its composition and in predicted metabolic  
54 pathways.

55

56

57

58

59

60

61

62

63

64

65

66

67

68

69

70

71

## 72 **Introduction**

73 Sponges (phylum Porifera) represent the most ancient metazoan lineage. For  
74 over 600 million years, their presence has been recorded in a great variety of habitats  
75 while, at the same time, maintaining a simple bauplan. Several studies point to the  
76 conclusion that the key to this adaptability may lie on their long association with  
77 microbes [1].

78 Sponges co-evolved with microorganisms forming, through time, a well-  
79 established symbiotic relationship. While the host provides nutrition from the  
80 degradation of other microbes and a habitat in its mesohyl, the prokaryotic community  
81 enhances its metabolic potential with complementary physiological functions and the  
82 production of useful secondary metabolites [2].

83 In the last two decades, advancements in next generation sequencing (NGS), in  
84 bioinformatics tools and the growth of gene marker databases, allowed a deeper study of  
85 this relationship. Nowadays, for example, it is known that organisms from the three  
86 domains of life inhabit sponges, with different levels of specificity [2,3]. The nature of  
87 this symbiotic relationship can be used to divide sponges into two main categories:  
88 high microbial abundance (HMA), in which a diverse microbiota can account for up to  
89 35% of the host's biomass and low microbial abundance (LMA), comprising sponges  
90 that are inhabited by fewer and less diverse microbes. In the latter, the most common  
91 scenario is the predominance of only one or two microbial phyla [4].

92 Another great motivation for gaining a better understanding of this relationship  
93 is the potential biotechnological applications of enzymes and bioactive molecules  
94 produced by microbial sponge symbionts. As reported by Abdelmohsen *et al.* [5], 57%  
95 of the marine natural products with described action against drug resistant pathogens  
96 (parasites, fungi and viruses) were extracted from species of the phylum Porifera.

97           Porifera has four extant classes that are characterized by different kinds of  
98 skeletal features: Demospongiae, Calcarea, Hexactinellida and Homoscleromorpha. The  
99 composition and dynamics of microbial symbionts and how they relate to taxonomic  
100 ranks in Demospongiae have been extensively studied [6]. This concentration of  
101 resources in the class comprising the majority of Porifera's described species has left a  
102 deficit of information on the microbiota of species belonging to the other classes.  
103 Additionally, there is still limited data on the microbiota of sponges of the South  
104 Atlantic. To date, few studies have analyzed the microbiota of calcareous sponges using  
105 high-throughput technology and the only species for which such data exist are *Clathrina*  
106 *clathrus*, *C. coriacea*, *Leucosolenia* sp., *Leuconia* sp. and *Leucetta antarctica* [7,8].

107           In the present study, we aim to shorten this gap by describing the microbial  
108 symbionts (Bacteria and Archaea) of *Paraleucilla magna* Klautau, Monteiro &  
109 Borojević, 2004 (Porifera, Calcarea) using next generation sequencing. This species was  
110 first described in the 1980's in Rio de Janeiro state [9] where it has been considered a  
111 cryptogenic species. Further records in Brazil were in São Paulo and Santa Catarina  
112 states, but *P. magna* has also been registered in several localities in the Mediterranean  
113 Sea [10–12], and in the Eastern Atlantic Ocean [13]. *P. magna* harbors a variety of  
114 organisms, such as crustaceans, molluscs, bryozoans, and polychaetes [14] and some  
115 bacteria that produce antimicrobial compounds have also been isolated from tissue  
116 samples of this species [15].

117           *P. magna* is capable of reproducing throughout the year and produces high  
118 numbers of larvae [16], two characteristics that indicate an efficient invasive potential  
119 [17]. Populations of *P. magna* present high demographic fluctuations and have not  
120 presented any visible harm to native Brazilian sponge populations. It is also one of the  
121 most common calcareous sponge species on the rocky coasts of Rio de Janeiro.

122 Moreover, in the Mediterranean Sea it is considered an invasive species, as it causes  
123 problems in mollusc farms.

124 To increase our knowledge about the symbionts of Brazilian sponges we  
125 analyzed the microbiota and the predicted metagenome of *P. magna* collected at  
126 Marica's archipelago in Rio de Janeiro, Brazil and performed a comparative analysis  
127 with the microbiota of other calcareous species with available data.

128

## 129 **Material and Methods**

### 130 **Sample collection and storage**

131 *Paraleucilla magna* individuals (n=2) that were at least 10 meters apart were  
132 collected by scuba diving at a depth of 6 meters in Maricás archipelago, Rio de Janeiro  
133 (23°00'41.8" S, 42°55'07.39" W), Brazil, in February 2013 (Fig 1). Excess seawater was  
134 removed by gently pressing the samples against sterile filter paper. A fragment of  
135 approximately 500 mg was excised from each individual with a sterile scalpel blade.  
136 Fragments were stored in RNAlater (Qiagen) at room temperature and transported to the  
137 laboratory for DNA extraction. A voucher of each specimen was deposited at the  
138 Porifera Collection of the Rio de Janeiro State University (UERJPOR) under voucher  
139 numbers UERJPOR27 (*P. magna* 6) and UERJPOR26 (*P. magna* 8), respectively.  
140 Morphological identification was performed by three specialists, BM, MK and ELE.  
141 For microbiota analysis of the surrounding seawater, 5 liters of surface seawater were  
142 collected in a sterile container and filtered through a 0.22 µm membrane (Millipore).  
143 The membrane was stored at -20 °C until processing.

144 **Figure 1. *P. magna in situ* photograph and sample collection locality.** (A) *In situ*  
145 photograph of one of the *P. magna* individuals collected for microbiota analyses (*P.*

146 *magna* 6). (B) Main island of Maricás Archipelago showing a vertical rocky slope, a  
147 typical environment in this island. (C) Map of South America showing Rio de Janeiro  
148 state in the inset. (D) Map of Rio de Janeiro state with collection area in the inset. (E)  
149 Central coast of Rio de Janeiro state including Guanabara Bay and nearby islands:  
150 Cagarras Archipelago (CA), Maricás Archipelago (MA) and Tijucas Archipelago (TI).  
151 (F) Collection locality in Maricás Archipelago.

152

### 153 **DNA extraction**

154 For more efficient extraction, small pieces of sponge tissue were cut with a  
155 sterile scalpel and macerated with sterile polypropylene pestles in microcentrifuge tubes  
156 containing extraction buffer. The filter membrane was cut into small pieces with  
157 sterilized scissors and placed into a microcentrifuge tube with the same buffer. Total  
158 DNA extractions were carried out with the DNEasy blood and tissue kit (Qiagen)  
159 following the manufacturer's recommendations. DNA quantification was performed  
160 using the Qubit High sensitivity ds DNA assay (Thermo Fisher Scientific, Brazil).

161

### 162 **Sponge phylogenetic analysis**

163 To provide a molecular tag for our *P. magna* samples, amplification of the 18S  
164 rRNA gene was performed as described by Redmond *et al.* (2007)[18]. The  
165 amplification products were purified, sequenced by Sanger methodology with the  
166 BigDye reagent (Thermofisher, São Paulo, Brazil) and analyzed on an Applied  
167 Biosystems 3500 Genetic Analyzer capillary instrument. A minimum of three  
168 sequencing reactions was performed for each fragment on both forward and reverse  
169 strands. Contigs from FASTA formatted sequences were constructed with Geneious R9

170 software (Biomatters) and used for BLAST [19] searches against GenBank [20]. The  
171 resulting sequences were deposited under accession numbers KY634245 and  
172 KY634237.

173

#### 174 **Marker gene library construction and sequencing**

175 For the analysis of the microbiota, the V4 region of the 16S rRNA gene was  
176 amplified using primers and PCR conditions as described by Caporaso *et al.* (2011)[23].  
177 Triplicate PCR reactions for each sample were pooled, purified, quantified with the  
178 Qubit fluorometer and paired-end sequenced with the 500 cycles MiSeq reagent kit V2  
179 on a MiSeq instrument (Illumina). Sequences were deposited on SRA databank under  
180 accession number SRP127694.

181

#### 182 **Processing of the sequence reads and microbiota analysis**

183 The sequence reads were processed with mothur software (v 1.39.5)[24]  
184 according to the Miseq SOP [25]. Briefly, paired-end reads were joined using the  
185 make.contigs command and filtered to exclude ambiguities (max=0), homopolymers  
186 (maxhomop=8), sequences over 252 bp and to ensure correct overlapping. Then, they  
187 were aligned against the Silva (v. 128) database [26], pre-clustered (diffs=2) and  
188 screened for chimeras, using the VSEARCH algorithm [27]. Screened sequences were  
189 classified, and those belonging to undesired taxa such as chloroplast, mitochondria and  
190 Eukarya were removed. Analysis was carried out separately for Bacteria and Archaea  
191 domains. To build operational taxonomic units (OTUs), clustering was set at 97%  
192 similarity.



193 For taxonomic description, sponge OTUs with relative abundance lower than 1%  
194 of the total number of sequences were grouped as others; this cutoff was defined at 5%  
195 for seawater OTUs. Rarefaction curves and alpha and beta diversity analysis were  
196 calculated after subsampling groups to the smallest library size. Results were plotted  
197 with Prism v7 software (GraphPad, USA).

198 A more thorough investigation was performed on two OTUs (OTU001 and  
199 OTU002) that presented a high relative abundance in *P. magna*. The get.oturep  
200 command was used within mothur software to obtain the representative fasta sequences  
201 for both OTUs. These sequences were aligned against sequences from a *P. magna* 16S  
202 rRNA gene clone library that was constructed by amplifying this gene from genomic  
203 DNA with primers 27F (5'-AGAGTTTGATCCTGGCTCAG-3') and 1492R (5'-  
204 GGTTACCTTGTTACGACTT-3'). The PCR amplification products were cloned into  
205 the PGEMT vector (Promega) and inserted into *E. coli* XL1Blue cells. Transformed  
206 bacterial colonies were picked, plasmid DNA was recovered and used in sequencing  
207 reactions to obtain full-length 16S rRNA gene sequences.

208 Sequences that presented >97% identity were chosen as full-length counterparts  
209 of the OTU sequences and were used on BLAST searches against the GenBank  
210 database. The best-hit sequences were downloaded and aligned with the OTUs'  
211 representative sequences using MAFFT algorithm. A maximum likelihood tree was  
212 built using the GTR model/ G+I and 500 bootstraps as a test of phylogeny with MEGA  
213 v7 software [22].

214

215

216

## 217 **Comparison with the microbiota of other calcareous sponges**

218 Raw V4 sequence reads of 16S rRNA surveys from the calcareous sponge  
219 species *Clathrina clathrus*, *C. coriacea*, *Leucosolenia* sp., *Leuconia* sp. and *Leucetta*  
220 *antarctica* and from seawater samples from the Antarctic region, Spain and Curaçao  
221 that are available at SRA were downloaded (Supplementary material). These sequences  
222 were analyzed along with our data set within mothur software essentially as described  
223 above. However, the maximum length parameter was altered to 125 bp to match the  
224 other samples' length. As there were multiple biological replicates from each sample,  
225 those replicates that did not reach 90% coverage were removed.

226 A biom formatted OTU table was used to calculate and plot alpha diversity  
227 within the Microbiome Analyst website (<http://www.microbiomeanalyst.ca/>) [28]. The  
228 following parameters were used: The low count filter was set without a minimum count  
229 and the prevalence in samples was set at 10%. The low variance filter was set at inter-  
230 quartile range and the percentage to remove was set at 0%. The data was then  
231 normalized by rarefying to the minimum library size and scaled by total sum scaling.

232 To determine the similarities of the microbial communities among the different  
233 sponge and seawater samples a dendrogram was constructed with mothur from Bray-  
234 Curtis distances obtained from samples rarefied to the minimum library size. Weighted  
235 unifrac was the chosen distance metric for beta diversity analysis from the rarefied  
236 samples, which was visualized on a NMDS graph.

237

## 238 **Functional category prediction with PICRUSt software**

239 For metagenome prediction, sequences were processed within mothur as  
240 outlined above but, instead of the Silva database, the Greengenes database  
241 (gg\_13\_5\_99) [29] was used to align and classify the OTUs. Three biom formatted files

242 were produced with the make.biom command in mothur containing OTU counts and  
243 Greengenes taxonomy labels in the PICRUSt format: Two with OTUs from the *P.*  
244 *magna* samples and the surrounding seawater of Maricás archipelago (one for the  
245 Bacteria and one for the Archaea domain), and a third one for the bacterial domains of  
246 all calcareous sponge and seawater samples.

247 These biom formatted files were uploaded to a Galaxy web application  
248 maintained by the Huttenhower lab (<https://huttenhower.sph.harvard.edu/galaxy/>).  
249 Using PICRUSt software[30], OTU counts were normalized by 16S copy number and  
250 the metagenome was predicted in the form of KEGG ortholog abundances [31] that was  
251 used for functional categorization.

252 The PICRUSt output in biom file format was uploaded for analysis in the  
253 Calypso online software (<http://cgenome.net/wiki/index.php/Calypso>; [32]) where the  
254 20 most abundant features were presented in heatmaps for *P. magna* samples  
255 description. For the comparison with other sponge species, the 15 most abundant  
256 features were chosen. Similarities in the predicted metagenomes among all calcareous  
257 sponges and seawater samples were determined with a hierarchical clustering graph  
258 according to Bray-Curtis distances that was also computed within the Calypso platform.  
259 The parameters used for these analyses on the Calypso platform were the following:  
260 Data was filtered by removing rare taxa with less than 1% relative abundance, and the  
261 data were normalized by total sum normalization followed by square root  
262 transformation. Statistical analysis was performed in STAMP [33], using two groups  
263 comparison between Sponges and Seawater, using the two-sided Welch's t-test with  
264 Benjamini-Hochberg FDR correction.

265

266

## 267 Results

268

### 269 Sequencing run details and alpha diversity

270 Sequencing of the V4 tag of the 16S rRNA gene produced, after mothur  
271 processing, 819,538 sequence reads for the two *P. magna* individuals, being 98.5%  
272 bacterial and 1.5% archaeal (Table 1). From the seawater sample of Maricás  
273 archipelago, 216,345 sequences were obtained, 93% bacterial and 7% archaeal. These  
274 sequences resulted on a total of 2,214 and 2,034 bacterial OTUs obtained for *P. magna*  
275 6 and 8, respectively, while 2,576 OTUs were retrieved for the seawater sample. We  
276 recovered fewer archaeal OTUs which were 24, 16 and 55 for *P. magna* 6, *P. magna* 8  
277 and seawater samples, respectively.

278

| Sample            | Taxon    | Nseqs   | Coverage | Sobs | Invsimpson |
|-------------------|----------|---------|----------|------|------------|
| <i>P. magna</i> 6 | Bacteria | 323,510 | 0.998    | 2214 | 2.98       |
| <i>P. magna</i> 8 | Bacteria | 483,744 | 0.999    | 2034 | 2.47       |
| Seawater          | Bacteria | 201,156 | 0.995    | 2576 | 24.00      |
| <i>P. magna</i> 6 | Archaea  | 8,569   | 0.999    | 24   | 1.23       |
| <i>P. magna</i> 8 | Archaea  | 3,715   | 0.999    | 16   | 1.26       |
| Seawater          | Archaea  | 15,189  | 0.999    | 55   | 4.72       |

279 **Table 1. Sequence data and alpha diversity.** Sobs: species observed; Invsimpson:  
280 Inverse Simpson index.

281

282 Although the species observed index (Sobs) presented little difference between  
283 seawater and sponge samples, a higher diversity was found in seawater, as indicated by  
284 the inverse Simpson (invSimpson) index, which measures richness as well as evenness  
285 (Table 1, Fig S1). All libraries had high coverage, above 99%, and reached a plateau in  
286 rarefaction curves (Fig S1).

287

288

## 289 **Taxonomic composition of *P. magna* and surrounding seawater microbiota**

290 The bacterial communities of both *P. magna* individuals and the surrounding  
291 seawater are composed of few phyla with relative abundance above 1% or 5%, for  
292 sponges and seawater samples, respectively. Proteobacteria is the most abundant, with  
293 the class Alphaproteobacteria representing 84%, 92% and 21% of the OTUs in *P.*  
294 *magna* 6, 8 and seawater, respectively (Fig 2). Gammaproteobacteria was more  
295 prominent in seawater sample, represented by 43% of the OTUs, while in *P. magna* 6  
296 and 8 only 5% and 4% of them, respectively, were affiliated with this taxon.  
297 Bacteroidetes was the second most abundant phylum, especially in seawater in which it  
298 amounted to 30% of the OTUs, while in *P. magna* 6 and 8 the phylum's proportion was  
299 3% and 2%, respectively. Planctomycetes was present only in the seawater sample (2%)  
300 and *P. magna* 6 (1%). OTUs affiliated with the phylum Marinimicrobia comprised 1%  
301 of the total in seawater (Fig 2).

302

### 303 **Figure 2. Taxonomic composition of the Bacteria domain from the microbiota of *P.***

304 ***magna* and seawater samples.** Only taxa with relative abundance above 1% (for  
305 sponges) or 5% (seawater) are shown. Others represents taxa below these cutoffs. The  
306 predominant phylum Proteobacteria was separated into classes.

307

308 At a lower taxonomic rank, both *P. magna* individuals presented two  
309 Alphaproteobacteria OTUs, hereafter named OTU001 and OTU002, as dominant taxa.  
310 OTU001 has a relative abundance of 38% and 49% in *P. magna* 6 and 8, respectively,  
311 and could not be classified beyond the class level. When its representative sequence was  
312 used for searches against full-length sequences obtained from a 16S rRNA clone library,  
313 a clone (A3) with 98% identity was found. The Blast search of this sequence against

314 GenBank database retrieved sequences with at most 91% similarity. These sequences  
315 originated from uncultured bacteria, mostly belonging to the class Alphaproteobacteria;  
316 those were isolated from diverse marine environments. When these sequences were  
317 used in a phylogenetic analysis, OTU001 and its full-length representative sequence  
318 formed a separate cluster with strong bootstrap support indicating that they might  
319 belong to a novel species or, perhaps, genus with low representation in databases (Fig  
320 3A).

321

322 **Figure 3. Phylogenetic analysis of *P. magna*'s predominant bacterial OTUs.**

323 Maximum likelihood trees of full length 16S rRNA gene sequences were constructed  
324 with Mega software. (A) OTU001 and closest relatives retrieved from Blast searches  
325 against Genbank. (B) OTU002 and closest relatives retrieved from Blast searches  
326 against Genbank. Only bootstrap values above 50% are shown.

327

328 OTU002 is a member of the Rhodospirillaceae family, which could not be  
329 classified to the genus level. It has a relative abundance of 43% and 41% in *P. magna*'s  
330 6 and 8 microbiota, respectively. As described above, a representative sequence was  
331 aligned against sequences from our clone library, and clone A6 showed 99% identity  
332 with the V4 region of OTU002. The full-length sequence was used on a Blast search  
333 against GenBank and sequences from Alphaproteobacteria found in marine  
334 environments were retrieved showing identities up to 95%. Upon a phylogenetic  
335 analysis (Fig 3B), our sequences grouped closely with bacteria isolated mainly from  
336 coastal and intertidal regions. So, although no further taxonomic information could be  
337 obtained, we could infer that this sequence belongs to an already reported, unnamed  
338 genus of marine bacteria.

339 An OTU affiliated with pItb-vmat-80, a genus of environmental  
340 Gammaproteobacteria isolated from a microbial mat found in a shallow submarine hot  
341 spring off the coast of Japan [34], was also observed only in *P. magna* 6.

342 OTUs found in the seawater sample were affiliated with a great diversity of  
343 genera, and 35% of them did not reach a minimum relative abundance of 5%. Typical  
344 marine genera were also observed such as those affiliated with the SAR and NOR  
345 clades, with SAR\_92 clade being the most abundant, with 14% of the OTUs (Fig 2).

346

#### 347 **Taxonomic composition of the archaeal domain**

348 Two archaeal phyla were found in all samples with variable relative abundance.  
349 While sponge OTUs were mostly affiliated with the phylum Thaumarcheota (99% and  
350 96% for *P. magna* 6 and 8, respectively), seawater sample OTUs were placed in nearly  
351 equal proportion within the phyla Thaumarcheota (47%) and Euryarcheota (53%). At  
352 the genus level, a greater difference between the sponge and seawater samples was  
353 observed. In *P. magna* individuals, the candidatus *Nitrosopumilus* was dominant (91%  
354 and 89% in *P. magna* 6 and 8, respectively) with a smaller contribution of candidatus  
355 *Nitrosopelagicus* and of subtypes Marine Group I and II. Meanwhile, in the seawater  
356 library half of the OTUs were affiliated with Marine Group II (51%), followed by those  
357 related to candidatus *Nitrosopumilus* (35%) and *Nitrosopelagicus* (11%) (Fig 4).

358

359 **Figure 4. Taxonomic composition of the Archaea domain from the microbiota of *P.***  
360 ***magna* and seawater samples.** Only taxa with relative abundance above 1% are  
361 shown.

362

363

## 364 **Functional category prediction of the bacterial and archaeal microbiomes**

365 PICRUSt software was used to predict metabolic pathways present in the  
366 microbiomes of *P. magna* and surrounding seawater. A heatmap of the 20 most  
367 abundant KEGG pathways at hierarchical level 2 shows that the functional profiles were  
368 clearly clustered according to their source for both bacterial and archaeal microbiomes  
369 (Figs 5A and B). The most abundant pathways in the *P. magna* bacterial communities  
370 are those related to membrane transport and carbohydrate, amino acid and energy  
371 metabolism, indicating the predominance of a heterotrophic metabolism. Replication  
372 and repair, nucleotide metabolism and translation pathways were higher in seawater  
373 bacterial communities, indicative of a higher proliferation potential in the open sea.  
374 Signal transduction, metabolism of other amino acids, terpenoids and polyketides,  
375 folding, sorting and degradation, general metabolism and transcription pathways were  
376 the least represented in all samples (Fig 5A).

377 **Figure 5. Abundance heatmap of predicted metagenomic functional profiles from**  
378 ***P. magna* and seawater samples.** The 20 most abundant metabolic pathways predicted  
379 with PICRUSt for Bacteria (A), and Archaea domains (B) are shown. Colors shift from  
380 blue (lower) to red (higher) according to pathway abundance in each sample.

381

382 The predicted metagenome of archaeal communities showed that pathways  
383 related to translation, and energy metabolism, the latter involving amino acids and  
384 carbohydrate metabolism, were the most abundant. Among these pathways, only  
385 carbohydrate metabolism was more prominent in seawater. Differences were found in  
386 intermediately abundant pathways, where metabolism of cofactors and vitamins were  
387 more prevalent in sponges while replication and repair and membrane transport were  
388 more prominent in seawater. Among features with smallest abundance, enzyme families



389 and metabolism were lower in the sponges and signal transduction, cell motility,  
390 processes and signaling pathways were lower in seawater (Fig 5B).

391

### 392 **Comparative analysis of the microbiota of different calcareous sponge species**

393 In order to compare the composition of the microbiota present in our samples  
394 and in other calcareous sponge species, we processed all datasets together within  
395 mothur software. Weighted unifrac phylogenetic distances were plotted on an NMDS  
396 graph in which we observed that, as expected, *P. magna* samples clustered together (Fig  
397 6). The clustering of biological replicates of the same species is also observed,  
398 indicating stability in the core microbiota. *Clathrina clathrus* and *C. coriacea*, species  
399 of the same genus, had the most similar communities, indicating that phylogenetic  
400 distance and microbiota membership are associated. The microbiota from the seawater  
401 samples show more similarity in composition among themselves than with the sponge  
402 samples and, therefore, are closer to each other in the plot. Similar results can be seen  
403 on a cladogram obtained using a Yue & Clayton distance matrix where seawater and  
404 sponge samples were also separated, and community similarity mirrored taxonomic  
405 affiliation (Fig S2).

406 **Figure 6. Beta diversity analysis of microbiota composition from different**  
407 **calcareous sponge species and seawater samples.** Weighted unifrac distances were  
408 calculated with mothur software and plotted on a NMDS graph. Samples from different  
409 individuals of the same species are represented by the same color.

410 Seawater samples showed greater microbiota diversity (Fig 7, Fig S3) than  
411 sponges, and the sample from Fields Bay, Antarctica, was the least diverse among them.  
412 Among the sponge species, *P. magna* presented the lowest Shannon diversity index,  
413 while all other samples presented higher and similar values (Fig 7).

414

415 **Figure 7. Alpha diversity analysis of microbiota from different calcareous sponge**  
416 **species and seawater samples.** The dispersion plot was built based on Shannon index  
417 of diversity.

418 A functional pathway comparison of the microbiomes predicted with PICRUSt  
419 software shows that, although the taxonomic composition of the microbiota is different,  
420 there is a level of conservation in which metabolic features are present in sponge and  
421 seawater samples, preserving the specificity of each symbiotic relationship, as the  
422 different species and seawater samples cluster together on a hierarchical clustering  
423 cladogram based on Bray-Curtis dissimilarity (Fig S4). Heatmap analysis of the 15 most  
424 abundant pathways indicates prevalence, in all samples, of heterotrophic metabolism  
425 and nutrient transport with higher incidence of carbohydrate and amino acids  
426 metabolism (Fig 8). Cellular housekeeping functions, nucleotide and lipid metabolism  
427 were the least abundant functions. Statistical analysis shows that pathways related to  
428 cell motility, membrane transport, genetic information processing, xenobiotics  
429 metabolism and signal transduction are higher in sponges (Fig 9). Meanwhile, amino  
430 acid and nucleotide metabolism, translation, replication and repair, folding, sorting and  
431 degradation and glycan biosynthesis and metabolism were more abundant in seawater  
432 symbionts.

433 **Figure 8. Abundance heatmap of predicted metagenomic functional profiles from**  
434 **different calcareous sponge species and seawater samples.** Heatmap shows the 15  
435 most abundant metabolic pathways predicted with PICRUSt. Colors shift from blue  
436 (lower) to red (higher) according to pathway abundance in each sample.

437 **Figure 9. Statistical analysis of the differential abundance of predicted**  
438 **metagenomic functional profiles from sponges and seawater samples.** Statistical  
439 analysis of the predicted metagenomes was performed with STAMP software.

440

#### 441 **Discussion**

442 In 2017, Moitinho-Silva *et al.* [7] described a worldwide initiative to study  
443 sponge microbiomes. It was reported that on the Earth Microbiome Project (EMP) [35]  
444 database there is sequencing data for over three thousand samples, representing 269  
445 sponge species from all over the world. However, no data was present for sponges of  
446 the Brazilian coast. In addition, the microbiota of calcareous sponges has been  
447 understudied despite the fact that initial investigations using cultivation procedures  
448 indicate that these animals are a potential source of microbial biodiversity and of  
449 bioactive molecules [36–38].

450 The study reported here presents the first description of *P. magna* microbiota by  
451 next generation sequencing and increases our knowledge of the microbial symbionts of  
452 calcareous sponges that inhabit the Brazilian coast. We observed that *P. magna*  
453 microbiota has low diversity, as indicated by the inverse Simpson index, and by the  
454 observation that only two OTUs corresponded to 80% (*P. magna* 6) and 90% (*P. magna*  
455 8) of all sequences. Meanwhile, all other OTUs were not represented above 0.05%.  
456 These rare OTUs might even be residue from the feeding habits of these animals. Giles  
457 *et al.* [39] previously described this microbial profile, of few OTUs with high relative  
458 abundance, on LMA sponges.

459 *Paraleucilla magna*'s microbiota is composed predominantly of microorganisms  
460 from the Proteobacteria phylum, following the pattern observed for LMA sponges (Fig  
461 2). The two most abundant OTUs could not be assigned to any known genus. OTU001

462 could only be classified in the class Alphaproteobacteria and OTU002 was allocated in  
463 the family Rhodospirillaceae. The Alphaproteobacteria are a quite diverse group of  
464 microorganisms with important biological roles [40]. In the phylogenetic tree, OTU001  
465 sequence did not cluster closely with any related sequence. The closest similarity was  
466 low and with a quite diverse group of microorganisms detected in various locations,  
467 being two from deep-sea regions, one from *Paeonia ostii*'s rhizosphere and one from a  
468 hyper saline mat (Fig 3A).

469 The family Rhodospirillaceae, to which OTU002 was assigned, has 34 known  
470 genera of Gram-negative microorganisms that present various nutritional strategies [41].  
471 In the phylogenetic tree constructed with related sequences retrieved from GenBank,  
472 OTU002 showed similarity with marine bacteria from different habitats, grouping  
473 closely with a sequence from a bacterium isolated from a marine biofilm.

474 Yarza *et al.* [42] reported a phenomenon in which, as sequencing and data  
475 processing technologies develop, the molecular description of new taxa extrapolate the  
476 classical taxonomy system, leaving a great number of microorganisms with no  
477 classification. This seems to be the case for OTU002. Differently, OTU001 appears to  
478 have not been sequenced yet, as the highest similarity value with other reported  
479 sequences in Genbank was 91%.

480 The seawater sample showed the greatest microbial diversity, and 35% of the  
481 OTUs did not reach a relative abundance of at least 5%. The most abundant OTU  
482 belongs to the SAR92 clade, a member of the Gammaproteobacteria (Fig 2). This group  
483 comprehends oligotrophic marine organisms, capable of producing proteorhodopsin, an  
484 enzyme that enables the generation of energy from sunlight. This allows a nutritional  
485 optimization in environments where carbon concentration is low. This clade is often  
486 found in coastal phototrophic zones, such as where our sample was collected [43].

487           The predicted bacterial metagenomes for *P. magna* individuals (Fig 5A)  
488 revealed that the most abundant functional pathways were related to carbohydrate and  
489 amino acid metabolism and membrane transport, indicating the participation of the  
490 symbionts in the obtention and transport of nutrients. The seawater predicted  
491 metagenome was distinguished mainly for having a lower abundance in pathways  
492 related to nutrient metabolism, which corroborates the fact that the most abundant  
493 genera in this sample are oligotrophic.

494           Karimi *et al.* [44] published a study reporting the main genomic features of  
495 alphaproteobacterial sponge symbionts. Corroborating our data, their study showed a  
496 prevalence of ABC transporters, fundamental for nutrient obtention, and versatile  
497 nutrients metabolism, pointing to a great importance in nutrient cycling. Moreover, they  
498 also described a reduction in motility observed in symbionts, contrary to that observed  
499 in free-living bacteria. In our heatmap (Fig 5), we also observed a low abundance in  
500 motility pathways.

501           In the domain Archaea, the phylum Thaumarcheota was predominant in *P.*  
502 *magna* samples, as already described by studies with other sponges (Fig 4) [45]. On a  
503 lower taxonomic rank, the genus candidatus *Nitrosopumillus* was the most abundant,  
504 followed by *Nitrosopellagicus*. In the seawater sample an almost equal proportion of  
505 Thaumarcheota and Euryarcheota were found. Accordingly, a previous study performed  
506 in two sites at Guanabara bay in Rio de Janeiro, using clone libraries of the archaeal  
507 ammonia oxidase gene, *amoA*, reported the absence of Euryarcheota and the presence of  
508 a distinctive community of Thaumarcheota in *P. magna* samples [46].

509           Few studies have been performed using archaeal specific primers, however, a  
510 consistency was found between the findings using this methodology and 16S rRNA  
511 sequencing. Our approach used the same primer for archaeal and bacterial kingdoms,

512 leading to a possible loss of resolution in the identification of the former. In spite of this  
513 possibility, no studies have reported limitation due to this choice of primers in the  
514 literature [47,48].

515 The phylum Thaumarcheota and the two genera found in our samples show  
516 metabolic activity related to the nitrogen biogeochemical cycle, standing out as an  
517 essential group for nitrification activities, using the generated energy for CO<sub>2</sub> fixation  
518 [45]. Also, this group has an important role as producer of cobalamine, an essential co-  
519 factor for animal life. As such, the predicted archaeal metagenomes of *P. magna*  
520 samples show a high abundance of pathways related to the metabolism of nitrogenated  
521 compounds and energy metabolism. Other functional categories with high abundance  
522 were those related to cellular maintenance.

523 Euryarcheota genomic data indicate participation in the degradation of proteins,  
524 lipids and vitamins [49,50]. The predicted archaeal metagenome for seawater, presents  
525 itself as a combination of the two observed phyla, with high abundance of nucleotide  
526 and carbohydrate metabolisms, showing the importance of these two phyla for nutrient  
527 cycling in the ocean.

528 Data shown here indicate that *P. magna* is most likely a LMA sponge, as it  
529 presents a microbiota dominated by one phylum, represented by few and abundant  
530 OTUs. When a large number of sponges from the class Demospongiae were analyzed,  
531 researchers were not able to find a prokaryotic signature of the class, as the reported  
532 microbiota compositions were usually species-specific [51]. In order to investigate this  
533 pattern in the class Calcarea, we analyzed the available microbiota found for other  
534 species available in the SRA database. We were able to obtain bacterial V4 16S rRNA  
535 sequence data from five species: *Clathrina clathrus*, *C. coriacea* and *Leucetta*  
536 *antarctica*, from the subclass Calcinea and *Leucosolenia* sp. and *Leuconia* sp. from the

537 subclass Calcaronea. We also analyzed the microbiota from four different seawater  
538 samples to compare the microbiota of the sponges and the environment they inhabit,  
539 which is fundamental for LMA sponge studies.

540         The microbiota of all sponge species was clearly separated from those of  
541 seawater samples both on the NMDS plot (Fig 6) and in the dendrogram (Fig S2).  
542 Seawater samples clustered together, preserving certain dissimilarities. Among the  
543 sponges, it has been shown that short phylogenetic distances correspond to more similar  
544 microbiota [52,53]. In the present study, we could observe this phenomenon in two  
545 distinct species of the same genus, *Clathrina clathrus* and *C. coriacea*, clustered  
546 together in the NMDS plot (Fig 6) and on the cladogram (Fig S2). These two sponges  
547 species are of the same subclass as *L. antarctica*, however, no similarity in microbiota  
548 composition was found, with the latter forming a separate branch on the cladogram. The  
549 species *Leucosolenia* sp. and *P. magna* are of the same order, Leucosolenida, but they  
550 did not cluster together. In fact, *Leucosolenia* sp., a species of the subclass Calcaronea,  
551 clustered with species of *Clathrina*, i.e. species of the subclass Calcinea (Fig S2).  
552 Although they are phylogenetically distant, they have the same type of aquiferous  
553 system, asconoid. *Paraleucilla* and *Leuconia* samples also formed a cluster (Fig S2) and  
554 are in proximity on the NMDS graph (Fig 6). Both species have a leuconoid aquiferous  
555 system.

556         Although the microbiota of only a few calcareous sponges has been studied, the  
557 clustering of asconoid and leuconoid species is very interesting. In the asconoid  
558 aquiferous system, the body wall of the sponge is very thin, perhaps allowing higher  
559 concentrations of O<sub>2</sub> in the mesohyl. Moreover, this thin body wall allows more light  
560 penetration. On the other hand, leuconoid sponges have thicker body walls, what may  
561 result in less O<sub>2</sub> in the mesohyl, albeit the presence of many canals and choanocyetary

562 chambers. Moreover, there is lesser light penetration in the mesohyl. Both O<sub>2</sub>  
563 concentrations and light penetration could be related to microorganism selection,  
564 explaining the proximity of sponges with the same aquiferous system.

565 Microbiota composition of the seawater samples was more diverse than those of  
566 the sponge species. The seawater sample from Bay Fields, Antarctica, was the least  
567 diverse and those from Montoya, Spain, showed the highest diversity. *P. magna* is the  
568 sponge species with the lowest microbial diversity, while *C. coriacea* and *L. antarctica*  
569 are the most diverse, based on the Shannon index (Fig 7). This index calculates  
570 diversity based on richness and abundance of microorganisms combined and although  
571 no index has been deemed as ideal, a study reported the Shannon index as being capable  
572 of describing the largest number of relationships/traits [54].

573 Hierarchical clustering based on the predicted bacterial metabolism showed that  
574 sponges from the same genus share similar metabolic pathways and these are clearly  
575 separate from seawater samples, indicating that there is a fundamental difference  
576 between the microorganisms inhabiting these two habitats and the functions they  
577 perform (Fig S4). This can also be seen in the heatmap of the 15 most abundant  
578 predicted pathways and in the statistical analysis with STAMP (Fig 8 and Fig 9,  
579 respectively), in which functions related to nutrient acquisition (membrane transport,  
580 xenobiotics biodegradation and metabolism) and symbiont/host interactions (cell  
581 motility, genetic information processing and signal transduction) were prevalent in  
582 sponges and functions related to cellular metabolism (amino acid metabolism) and  
583 proliferation (nucleotide metabolism, replication and repair) had higher abundance in  
584 seawater (Fig 9). Conversely, Karimi *et al.* [55], showed that ABC transporters were  
585 more prevalent in sponges.



586           This study shows the first description of *P. magna*'s microbiota by next-  
587 generation sequencing. This microbiota is characteristic of an LMA sponge, is  
588 dominated by few Alphaproteobacteria OTUs and has a predicted metabolism directed  
589 to nutrient uptake and degradation and housekeeping functions. Also, when compared to  
590 other species of calcareous sponges, *P. magna* symbionts differed at both OTU and  
591 metabolic levels. Other studies need to be performed in order to determine if *P. magna*  
592 presents a stable microbiota across seasonal and geographical distances.

593

#### 594 Acknowledgments

595 This work was partially supported by grants from Fundação Carlos Chagas Filho de  
596 Amparo à Pesquisa do Estado do Rio de Janeiro, Conselho Nacional de  
597 Desenvolvimento Científico e Tecnológico and Coordenação de Aperfeiçoamento de  
598 Pessoal de Nível Superior – Brasil (CAPES) – Finance Code 001.

599

600

601

602

603

604

605

606

607

608

609

610

## 611 **References**

612

613

- 614 1. van Soest RWM, Boury-Esnault N, Vacelet J, Dohrmann M, Erpenbeck D, de  
615 Voogd NJ, et al. Global diversity of sponges (Porifera). *PLoS One*. 2012;7.  
616 doi:10.1371/journal.pone.0035105
- 617 2. Hentschel U, Piel J, Degnan SM, Taylor MW. Genomic insights into the marine  
618 sponge microbiome. *Nat Rev Microbiol*. Nature Publishing Group; 2012;10:  
619 641–654. doi:10.1038/nrmicro2839
- 620 3. Webster NS, Thomas T. The sponge hologenome. *MBio*. 2016;7: 1–14.  
621 doi:10.1128/mBio.00135-16
- 622 4. Gloeckner V, Wehrl M, Moitinho-Silva L, Gernert C, Hentschel U, Schupp P, et  
623 al. The HMA-LMA dichotomy revisited: An electron microscopical survey of 56  
624 sponge species. *Biol Bull*. 2014;227: 78–88. doi:10.1086/BBLv227n1p78
- 625 5. Abdelmohsen UR, Balasubramanian S, Oelschlaeger TA, Grkovic T, Pham NB,  
626 Quinn RJ, et al. Potential of marine natural products against drug-resistant  
627 fungal, viral, and parasitic infections. *Lancet Infect Dis*. Elsevier Ltd; 2017;17:  
628 e30–e41. doi:10.1016/S1473-3099(16)30323-1
- 629 6. Thomas T, Moitinho-Silva L, Lurgi M, Björk JR, Easson C, Astudillo-García C,  
630 et al. Diversity, structure and convergent evolution of the global sponge  
631 microbiome. *Nat Commun*. 2016;7. doi:10.1038/ncomms11870
- 632 7. Moitinho-Silva L, Nielsen S, Amir A, Gonzalez A, Ackermann GL, Cerrano C,  
633 et al. The sponge microbiome project. *Gigascience*. 2017;6: 1–7.  
634 doi:10.1093/gigascience/gix077
- 635 8. Rodríguez-Marconi S, De La Iglesia R, Díez B, Fonseca CA, Hajdu E, Trefault

- 636 N, et al. Characterization of bacterial, archaeal and eukaryote symbionts from  
637 antarctic sponges reveals a high diversity at a three-domain level and a particular  
638 signature for this ecosystem. PLoS One. 2015;10: 1–19.  
639 doi:10.1371/journal.pone.0138837
- 640 9. Klautau M, Monteiro L, Borojevic R. First occurrence of the genus *Paraleucilla*  
641 (*Calcarea*, *Porifera*) in the Atlantic Ocean: *P. magna* sp nov. *Zootaxa*. 2004;8: 1–  
642 8. doi:10.5281/zenodo.158320
- 643 10. Longo C, Mastrototaro F, Corriero G. Occurrence of *Paraleucilla magna*  
644 (*Porifera*: *Calcarea*) in the Mediterranean Sea. *J Mar Biol Assoc UK*. Cambridge  
645 University Press; 2007;87: 1749–1755. doi:10.1017/S0025315407057748
- 646 11. Guardiola M, Frotscher J, María •, Uriz J. Genetic structure and differentiation at  
647 a short-time scale of the introduced calcarean sponge *Paraleucilla magna* to the  
648 western Mediterranean. doi:10.1007/s10750-011-0948-1
- 649 12. Biology M, Biology M. New data on the distribution of the alien sponge  
650 *Paraleucilla magna* Klautau , Monteiro & Borojevic , 2004 in the ... sponge  
651 *Paraleucilla magna* Klautau ,. 2016;
- 652 13. Agell G, Frotscher J, Guardiola M, Pascual M, Uriz MJ. Characterization of nine  
653 polymorphic microsatellite loci for the calcareous sponge *Paraleucilla magna*  
654 Klautau et al. 2004 introduced to the Mediterranean Sea. *Conserv Genet Resour*.  
655 2012;4: 403–405. doi:10.1007/s12686-011-9560-y
- 656 14. Padua A, Lanna E, Klautau M. Macrofauna inhabiting the sponge *Paraleucilla*  
657 *magna* (*Porifera*: *Calcarea*) in Rio de Janeiro, Brazil.  
658 doi:10.1017/S0025315412001804
- 659 15. Santos OCS, Pontes PVML, Santos JFM, Muricy G, Giambiagi-deMarval M,  
660 Laport MS. Isolation, characterization and phylogeny of sponge-associated

- 661 bacteria with antimicrobial activities from Brazil. Res Microbiol. Elsevier  
662 Masson SAS; 2010;161: 604–612. doi:10.1016/j.resmic.2010.05.013
- 663 16. Lanna E, Klautau M. Embryogenesis and larval ultrastructure in *Paraleucilla*  
664 magna (Calcarea, Calcaronea), with remarks on the epilarval trophocyte  
665 epithelium (“placental membrane”). Zoomorphology. Springer-Verlag; 2012;131:  
666 277–292. doi:10.1007/s00435-012-0160-5
- 667 17. Lanna E, Paranhos R, Paiva PC, Klautau M. Environmental effects on the  
668 reproduction and fecundity of the introduced calcareous sponge *Paraleucilla*  
669 magna in Rio de Janeiro, Brazil. Mar Ecol. Wiley/Blackwell (10.1111); 2015;36:  
670 1075–1087. doi:10.1111/maec.12202
- 671 18. Redmond NE, van Soest RWM, Kelly M, Raleigh J, Travers SAA, McCormack  
672 GP. Reassessment of the classification of the Order Haplosclerida (Class  
673 Demospongiae, Phylum Porifera) using 18S rRNA gene sequence data. Mol  
674 Phylogenet Evol. 2007;43: 344–352. doi:10.1016/j.ympev.2006.10.021
- 675 19. Altschul SF, Gish W, Miller W, Myers EW, Lipman DJ. Basic local alignment  
676 search tool. J Mol Biol. Academic Press; 1990;215: 403–410.  
677 doi:10.1016/S0022-2836(05)80360-2
- 678 20. Benson, Dennis; Karsch-Mizrachi, Ilene; Ostel, James; Wheeler D. Genbank.  
679 Nucleic Acids Res. 2011;39.
- 680 21. Katoh K, Standley DM. Article Fast Track MAFFT Multiple Sequence  
681 Alignment Software Version 7: Improvements in Performance and Usability.  
682 doi:10.1093/molbev/mst010
- 683 22. Kumar S, Stecher G, Tamura K, Dudley J. MEGA7: Molecular Evolutionary  
684 Genetics Analysis Version 7.0 for Bigger Datasets. Mol Biol Evol. 2016;33:  
685 1870–1874. doi:10.1093/molbev/msw054

- 686 23. Caporaso JG, Lauber CL, Walters WA, Berg-Lyons D, Lozupone CA,  
687 Turnbaugh PJ, et al. Global patterns of 16S rRNA diversity at a depth of millions  
688 of sequences per sample. *Proc Natl Acad Sci.* 2011;108: 4516–4522.  
689 doi:10.1073/pnas.1000080107
- 690 24. Schloss PD, Westcott SL, Ryabin T, Hall JR, Hartmann M, Hollister EB, et al.  
691 Introducing mothur: Open-Source, Platform-Independent, Community-Supported  
692 Software for Describing and Comparing Microbial Communities. *Appl Environ*  
693 *Microbiol.* 2009;75: 7537–7541. doi:10.1128/AEM.01541-09
- 694 25. Kozich JJ, Westcott SL, Baxter NT, Highlander SK, Schloss PD. Development of  
695 a dual-index sequencing strategy and curation pipeline for analyzing amplicon  
696 sequence data on the miseq illumina sequencing platform. *Appl Environ*  
697 *Microbiol.* 2013;79: 5112–5120. doi:10.1128/AEM.01043-13
- 698 26. Quast C, Pruesse E, Yilmaz P, Gerken J, Schweer T, Yarza P, et al. The SILVA  
699 ribosomal RNA gene database project: improved data processing and web-based  
700 tools. *Nucleic Acids Res.* Oxford University Press; 2012;41: D590–D596.  
701 doi:10.1093/nar/gks1219
- 702 27. Rognes T, Flouri T, Nichols B, Quince C, Mahé F. VSEARCH: a versatile open  
703 source tool for metagenomics. *PeerJ.* PeerJ Inc.; 2016;4: e2584.  
704 doi:10.7717/peerj.2584
- 705 28. Dhariwal A, Chong J, Habib S, King IL, Agellon LB, Xia J. MicrobiomeAnalyst:  
706 a web-based tool for comprehensive statistical, visual and meta-analysis of  
707 microbiome data. *Nucleic Acids Res.* Oxford University Press; 2017;45: W180–  
708 W188. doi:10.1093/nar/gkx295
- 709 29. DeSantis TZ, Hugenholtz P, Larsen N, Rojas M, Brodie EL, Keller K, et al.  
710 Greengenes, a chimera-checked 16S rRNA gene database and workbench

- 711 compatible with ARB. *Appl Environ Microbiol.* American Society for  
712 Microbiology; 2006;72: 5069–72. doi:10.1128/AEM.03006-05
- 713 30. Langille MGI, Zaneveld J, Caporaso JG, McDonald D, Knights D, Reyes JA, et  
714 al. Predictive functional profiling of microbial communities using 16S rRNA  
715 marker gene sequences. *Nat Biotechnol.* 2013;31: 814–821.  
716 doi:10.1038/nbt.2676
- 717 31. Kanehisa M, Sato Y, Kawashima M, Furumichi M, Tanabe M. KEGG as a  
718 reference resource for gene and protein annotation. *Nucleic Acids Res.* 2015;44:  
719 457–462. doi:10.1093/nar/gkv1070
- 720 32. Zakrzewski M, Proietti C, Ellis JJ, Hasan S, Brion M-J, Berger B, et al. Calypso:  
721 a user-friendly web-server for mining and visualizing microbiome–environment  
722 interactions. *Bioinformatics.* Oxford University Press; 2016;33: btw725.  
723 doi:10.1093/bioinformatics/btw725
- 724 33. Parks D, Beiko R. STAMP User ’s Guide v2. 2011; Available:  
725 [http://kiwi.cs.dal.ca/Software/images/0/02/STAMP\\_Users\\_Guide\\_v2.0.0.pdf](http://kiwi.cs.dal.ca/Software/images/0/02/STAMP_Users_Guide_v2.0.0.pdf)
- 726 34. Hirayama H, Sunamura M, Takai K, Nunoura T, Noguchi T, Oida H, et al.  
727 Culture-Dependent and-Independent Characterization of Microbial Communities  
728 Associated with a Shallow Submarine Hydrothermal System Occurring within a  
729 Coral Reef off Taketomi Island, Japan. *Appl Environ Microbiol.* 2007;73: 7642–  
730 7656. doi:10.1128/AEM.01258-07
- 731 35. Thompson LR, Sanders JG, McDonald D, Amir A, Ladau J, Locey KJ, et al. A  
732 communal catalogue reveals Earth ’s multiscale microbial diversity. *Nature.*  
733 2017;551: 457–463. doi:10.1038/nature24621
- 734 36. Fromont, Jane; Huggett, Megan; Lengger, Sabine; Grice, Kitti; Schonberg C.  
735 Characterization of *Leucetta prolifera*, a calcarean cyanosponge from south-

- 736 western Australia, and its symbionts. *J Mar Biol Assoc United Kingdom*. 2014;  
737 doi:10.1111/j.1462-2920.2008.01815.x
- 738 37. Roué M, Quévrain E, Domart-Coulon I, Bourguet-Kondracki ML. Assessing  
739 calcareous sponges and their associated bacteria for the discovery of new  
740 bioactive natural products. *Nat Prod Rep*. 2012;29: 739–751.  
741 doi:10.1039/c2np20040f
- 742 38. Flemer B, Kennedy J, Margassery LM, Morrissey JP, O’Gara F, Dobson ADW.  
743 Diversity and antimicrobial activities of microbes from two Irish marine sponges,  
744 *Suberites carnosus* and *Leucosolenia* sp. *J Appl Microbiol*. 2012;112: 289–301.  
745 doi:10.1111/j.1365-2672.2011.05211.x
- 746 39. Giles EC, Kamke J, Moitinho-Silva L, Taylor MW, Hentschel U, Ravasi T, et al.  
747 Bacterial community profiles in low microbial abundance sponges. *FEMS*  
748 *Microbiol Ecol*. 2013;83: 232–241. doi:10.1111/j.1574-6941.2012.01467.x
- 749 40. Williams KP, Sobral BW, Dickerman AW. A Robust Species Tree for the  
750 Alphaproteobacteria † Downloaded from. *J Bacteriol*. 2007;189: 4578–4586.  
751 doi:10.1128/JB.00269-07
- 752 41. Baldani JI, Videira SS, dos Santos Teixeira KR, Reis VM, de Oliveira ALM,  
753 Schwab S, et al. The Family Rhodospirillaceae. *The Prokaryotes*. Berlin,  
754 Heidelberg: Springer Berlin Heidelberg; 2014. pp. 533–618. doi:10.1007/978-3-  
755 642-30197-1\_300
- 756 42. Yarza P, Yilmaz P, Pruesse E, Glöckner FO, Ludwig W, Schleifer K-H, et al.  
757 Uniting the classification of cultured and uncultured bacteria and archaea using  
758 16S rRNA gene sequences. *Nat Rev Microbiol*. Nature Publishing Group;  
759 2014;12: 635–645. doi:10.1038/nrmicro3330
- 760 43. Stingl U, Desiderio RA, Cho J-C, Vergin KL, Giovannoni SJ. The SAR92 clade:

- 761 An abundant coastal clade of culturable marine bacteria possessing  
762 proteorhodopsin A C C E P T E D. *Appl Environ Microbiol.* 2007;  
763 doi:10.1128/AEM.02559-06
- 764 44. Karimi E, Slaby BM, Soares AR, Blom J, Hentschel U, Costa R. Metagenomic  
765 binning reveals versatile nutrient cycling and distinct adaptive features in  
766 alphaproteobacterial symbionts of marine sponges. *FEMS Microbiol Ecol.*  
767 Oxford University Press; 2018;94. doi:10.1093/femsec/fiy074
- 768 45. Zhang F, Pita L, Erwin PM, Abaid S, López-Legentil S, Hill RT. Symbiotic  
769 archaea in marine sponges show stability and host specificity in community  
770 structure and ammonia oxidation functionality. *FEMS Microbiol Ecol.* Oxford  
771 University Press; 2014;90: 699–707. doi:10.1111/1574-6941.12427
- 772 46. Turque AS, Batista D, Silveira CB, Cardoso AM, Vieira RP, Moraes FC, et al.  
773 Environmental shaping of sponge associated archaeal communities. *PLoS One.*  
774 2010;5. doi:10.1371/journal.pone.0015774
- 775 47. Brochier-Armanet C, Boussau B, Gribaldo S, Forterre P. Mesophilic  
776 crenarchaeota: proposal for a third archaeal phylum, the Thaumarchaeota. *Nat*  
777 *Rev Microbiol.* Nature Publishing Group; 2008;6: 245–252.  
778 doi:10.1038/nrmicro1852
- 779 48. Pester M, Wagner M. The Thaumarchaeota: an emerging view of their phylogeny  
780 and ecophysiology. *Curr Opin Microbiol.* Elsevier Current Trends; 2011;14:  
781 300–306. doi:10.1016/J.MIB.2011.04.007
- 782 49. Iverson V, Morris RM, Frazar CD, Berthiaume CT, Morales RL, Armbrust EV.  
783 Untangling Genomes from Metagenomes: Revealing an Uncultured Class of  
784 Marine Euryarchaeota. doi:10.1126/science.1093857
- 785 50. Zhang CL, Xie W, Martin-Cuadrado A-B, Rodriguez-Valera F. Marine Group II



- 786 Archaea, potentially important players in the global ocean carbon cycle. *Front*  
787 *Microbiol. Frontiers*; 2015;6: 1108. doi:10.3389/fmicb.2015.01108
- 788 51. Steinert G, Rohde S, Janussen D, Blaurock C, Schupp PJ. Host-specific assembly  
789 of sponge-associated prokaryotes at high taxonomic ranks OPEN.  
790 doi:10.1038/s41598-017-02656-6
- 791 52. Easson CG, Thacker RW. Phylogenetic signal in the community structure of  
792 host-specific microbiomes of tropical marine sponges. *Front Microbiol.* 2014;5:  
793 1–11. doi:10.3389/fmicb.2014.00532
- 794 53. Souza DT, Genuário DB, Silva FSP, Pansa CC, Kavamura VN, Moraes FC, et al.  
795 Analysis of bacterial composition in marine sponges reveals the influence of host  
796 phylogeny and environment. Olson J, editor. *FEMS Microbiol Ecol.* Oxford  
797 University Press; 2017;93: fiw204. doi:10.1093/femsec/fiw204
- 798 54. Morris EK, Caruso T, Buscot F, Fischer M, Hancock C, Maier TS, et al.  
799 Choosing and using diversity indices: insights for ecological applications from  
800 the German Biodiversity Exploratories. *Ecol Evol.* Wiley-Blackwell; 2014;4:  
801 3514–3524. doi:10.1002/ece3.1155
- 802 55. R. EKMRJGJXMR. Comparative Metagenomics Reveals the Distinctive  
803 Adaptive Features of the *Spongia officinalis* Endosymbiotic Consortium. 2017;  
804 doi:10.3389/fmicb.2017.02499
- 805  
806  
807  
808  
809  
810

811 Supporting information captions

812 **Figure S1. Rarefaction analysis of microbiota from *P. magna* and seawater**

813 **samples.** (A) Bacteria domain and (B) Archaea domain.

814 **Figure S2. Hierarchical clustering of microbiota composition from different**

815 **calcareous sponge species and seawater samples.** Distance among groups was defined

816 by the Yue & Clayton theta calculator with mothur software.

817 **Figure S3. Rarefaction analysis of microbial community richness of different**

818 **calcareous sponge species and seawater samples.**

819 **Figure S4. Hierarchical clustering according to Bray-Curtis distances of predicted**

820 **functional profiles from different calcareous sponge species and seawater samples.**

821 Metabolic pathways were predicted with PICRUSt and Bray-Curtis distances were

822 calculated with Calypso software.

823

824

825

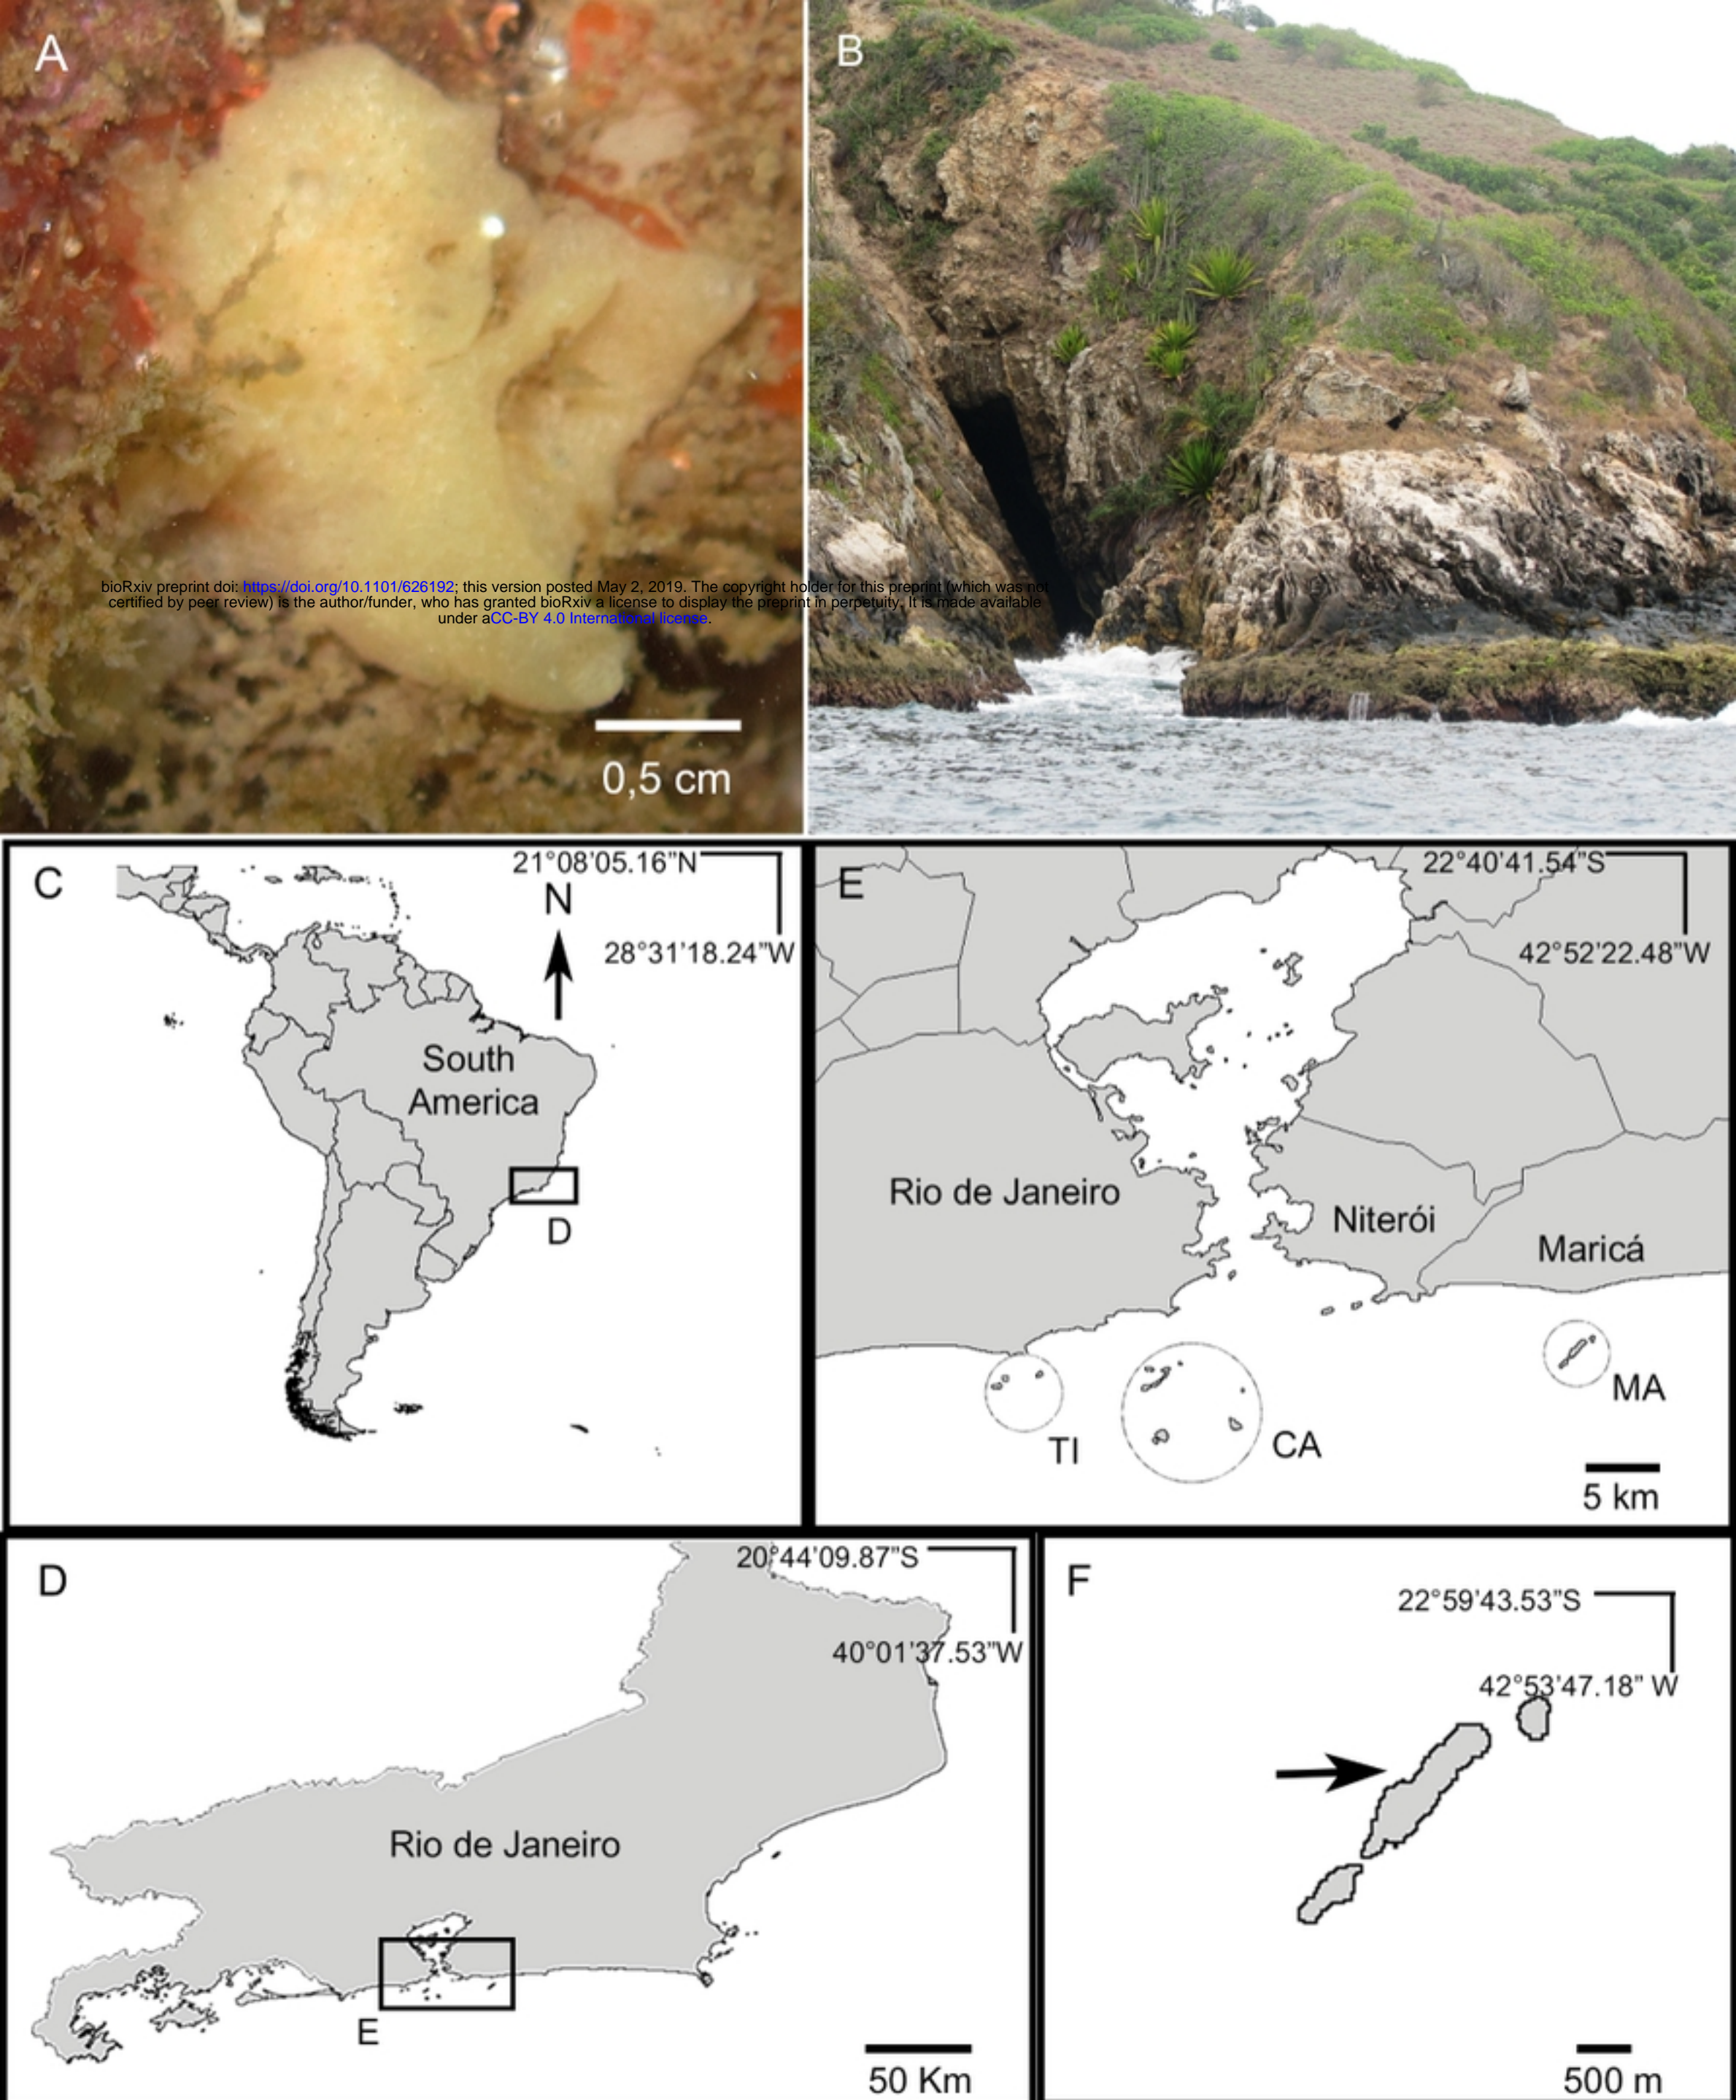

Figure 1

bioRxiv preprint doi: <https://doi.org/10.1101/626192>; this version posted May 2, 2019. The copyright holder for this preprint (which was not certified by peer review) is the author/funder, who has granted bioRxiv a license to display the preprint in perpetuity. It is made available under aCC-BY 4.0 International license.

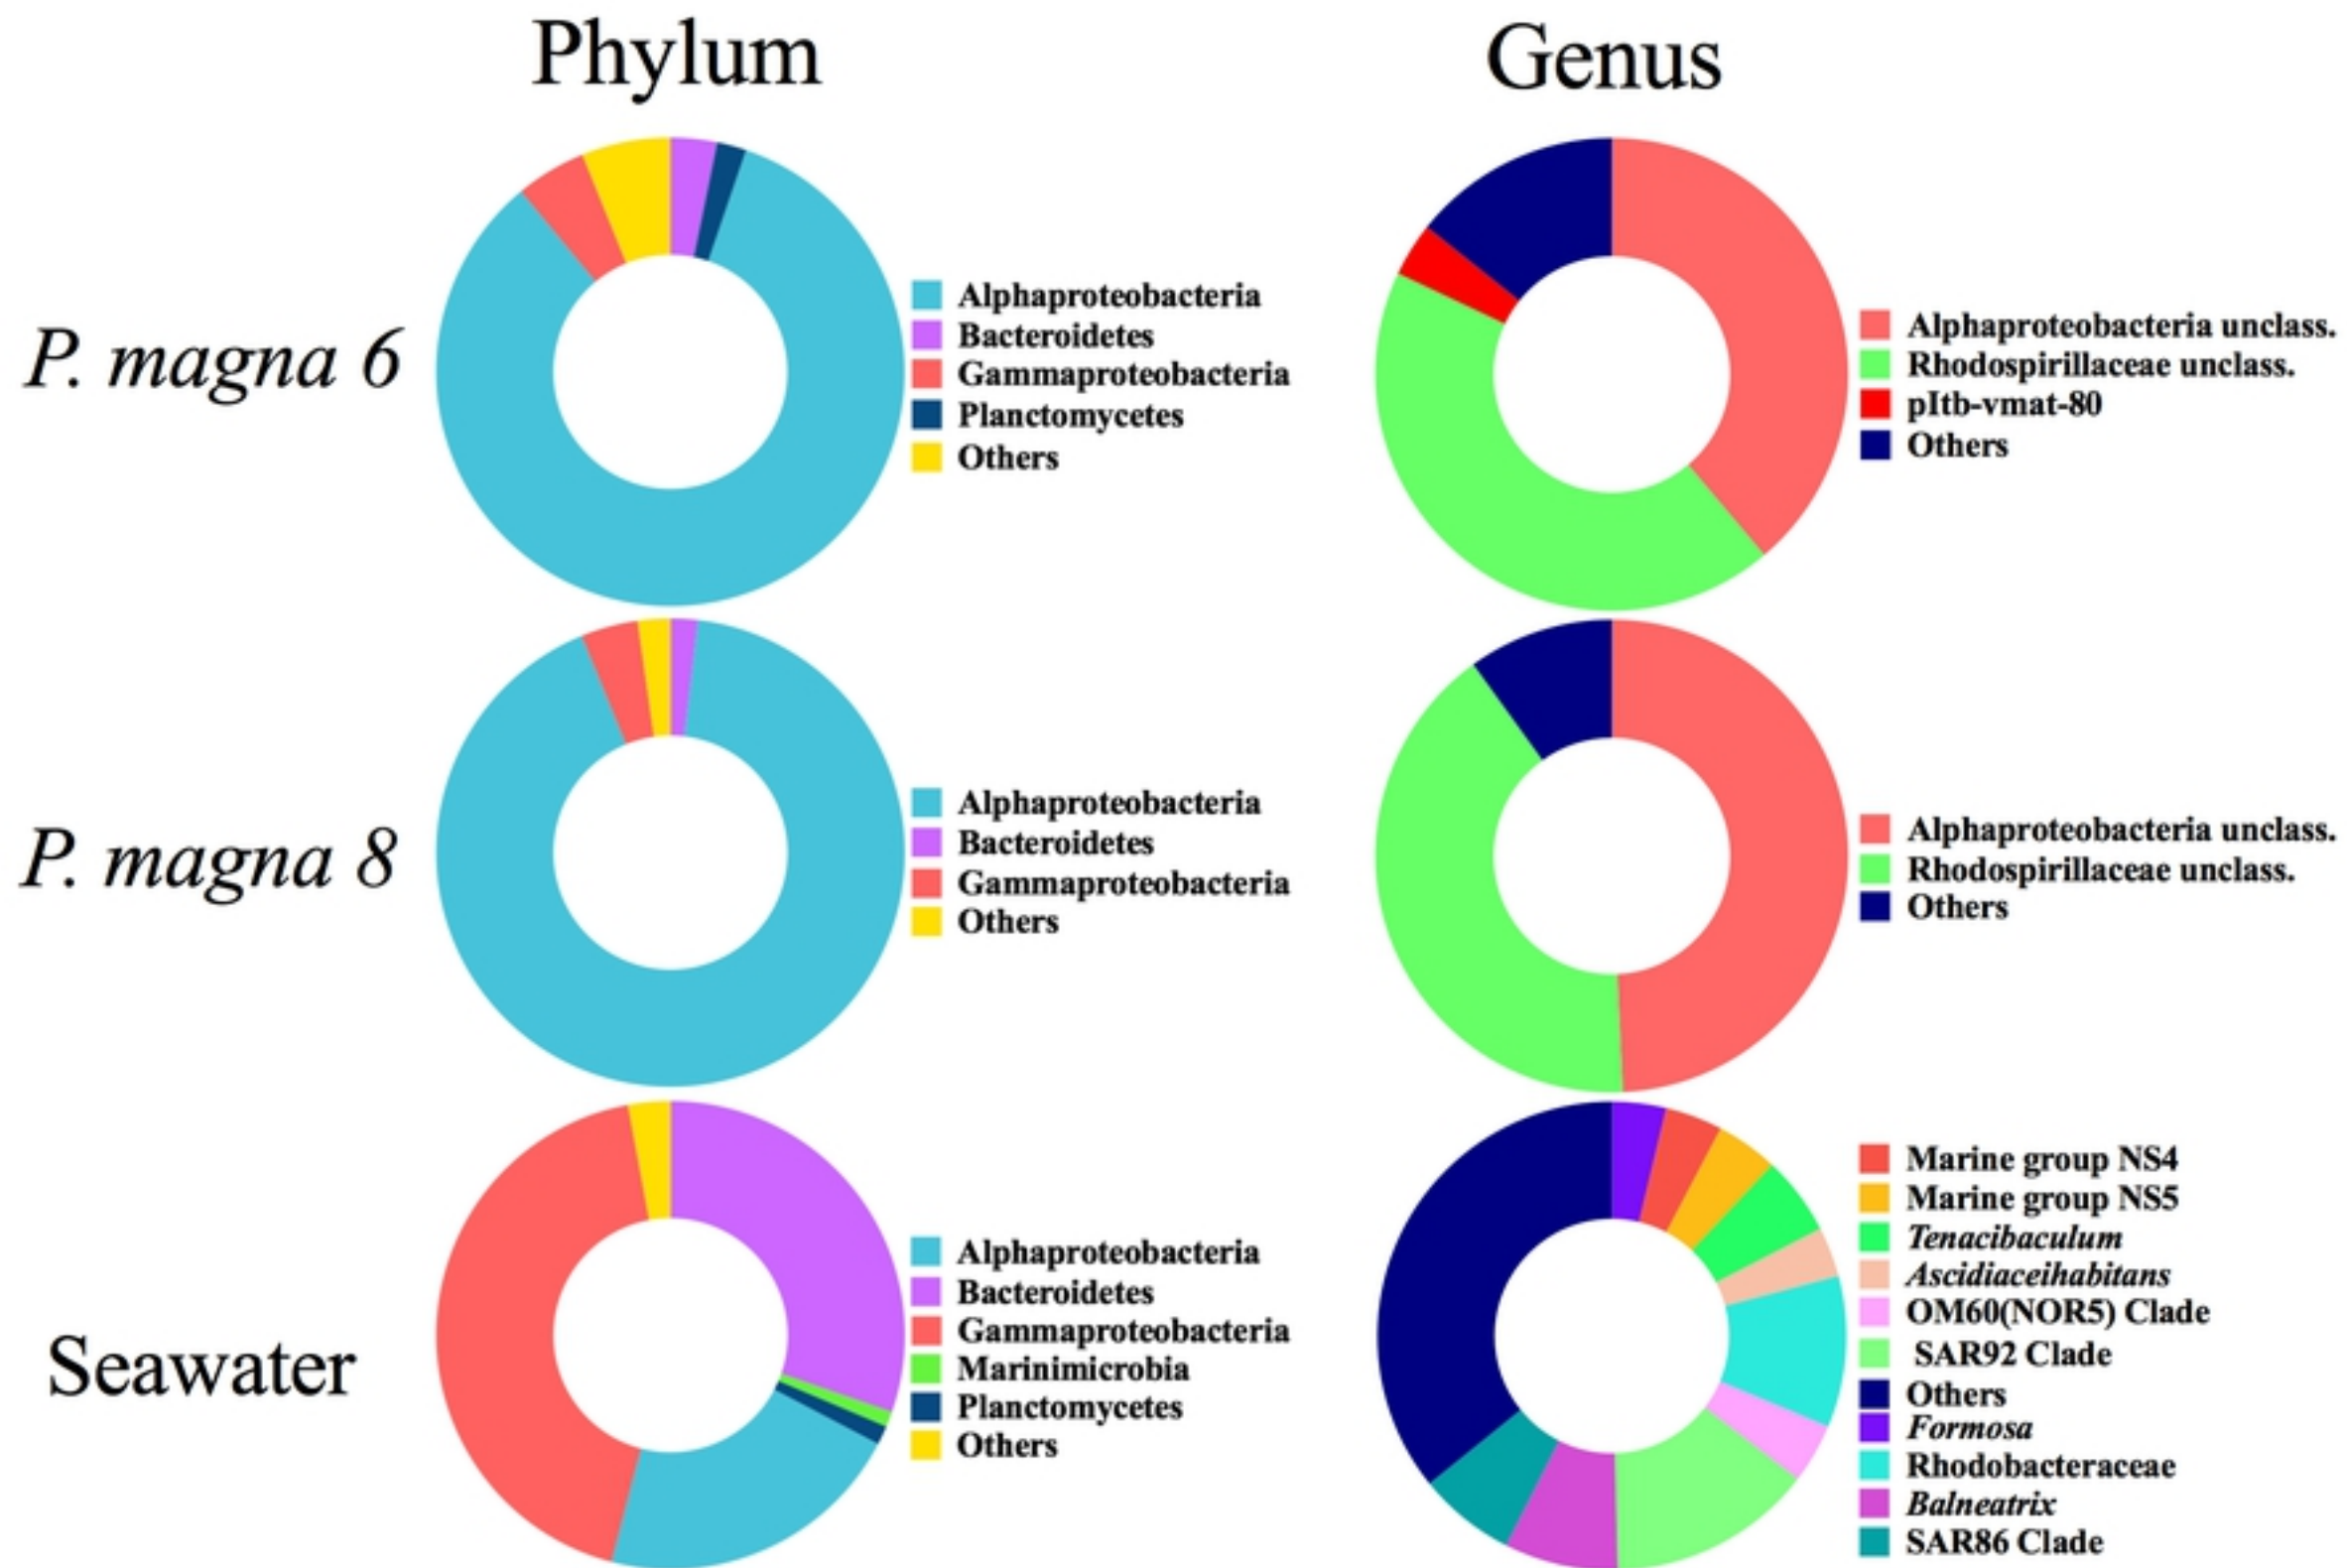

Figure 2

**A**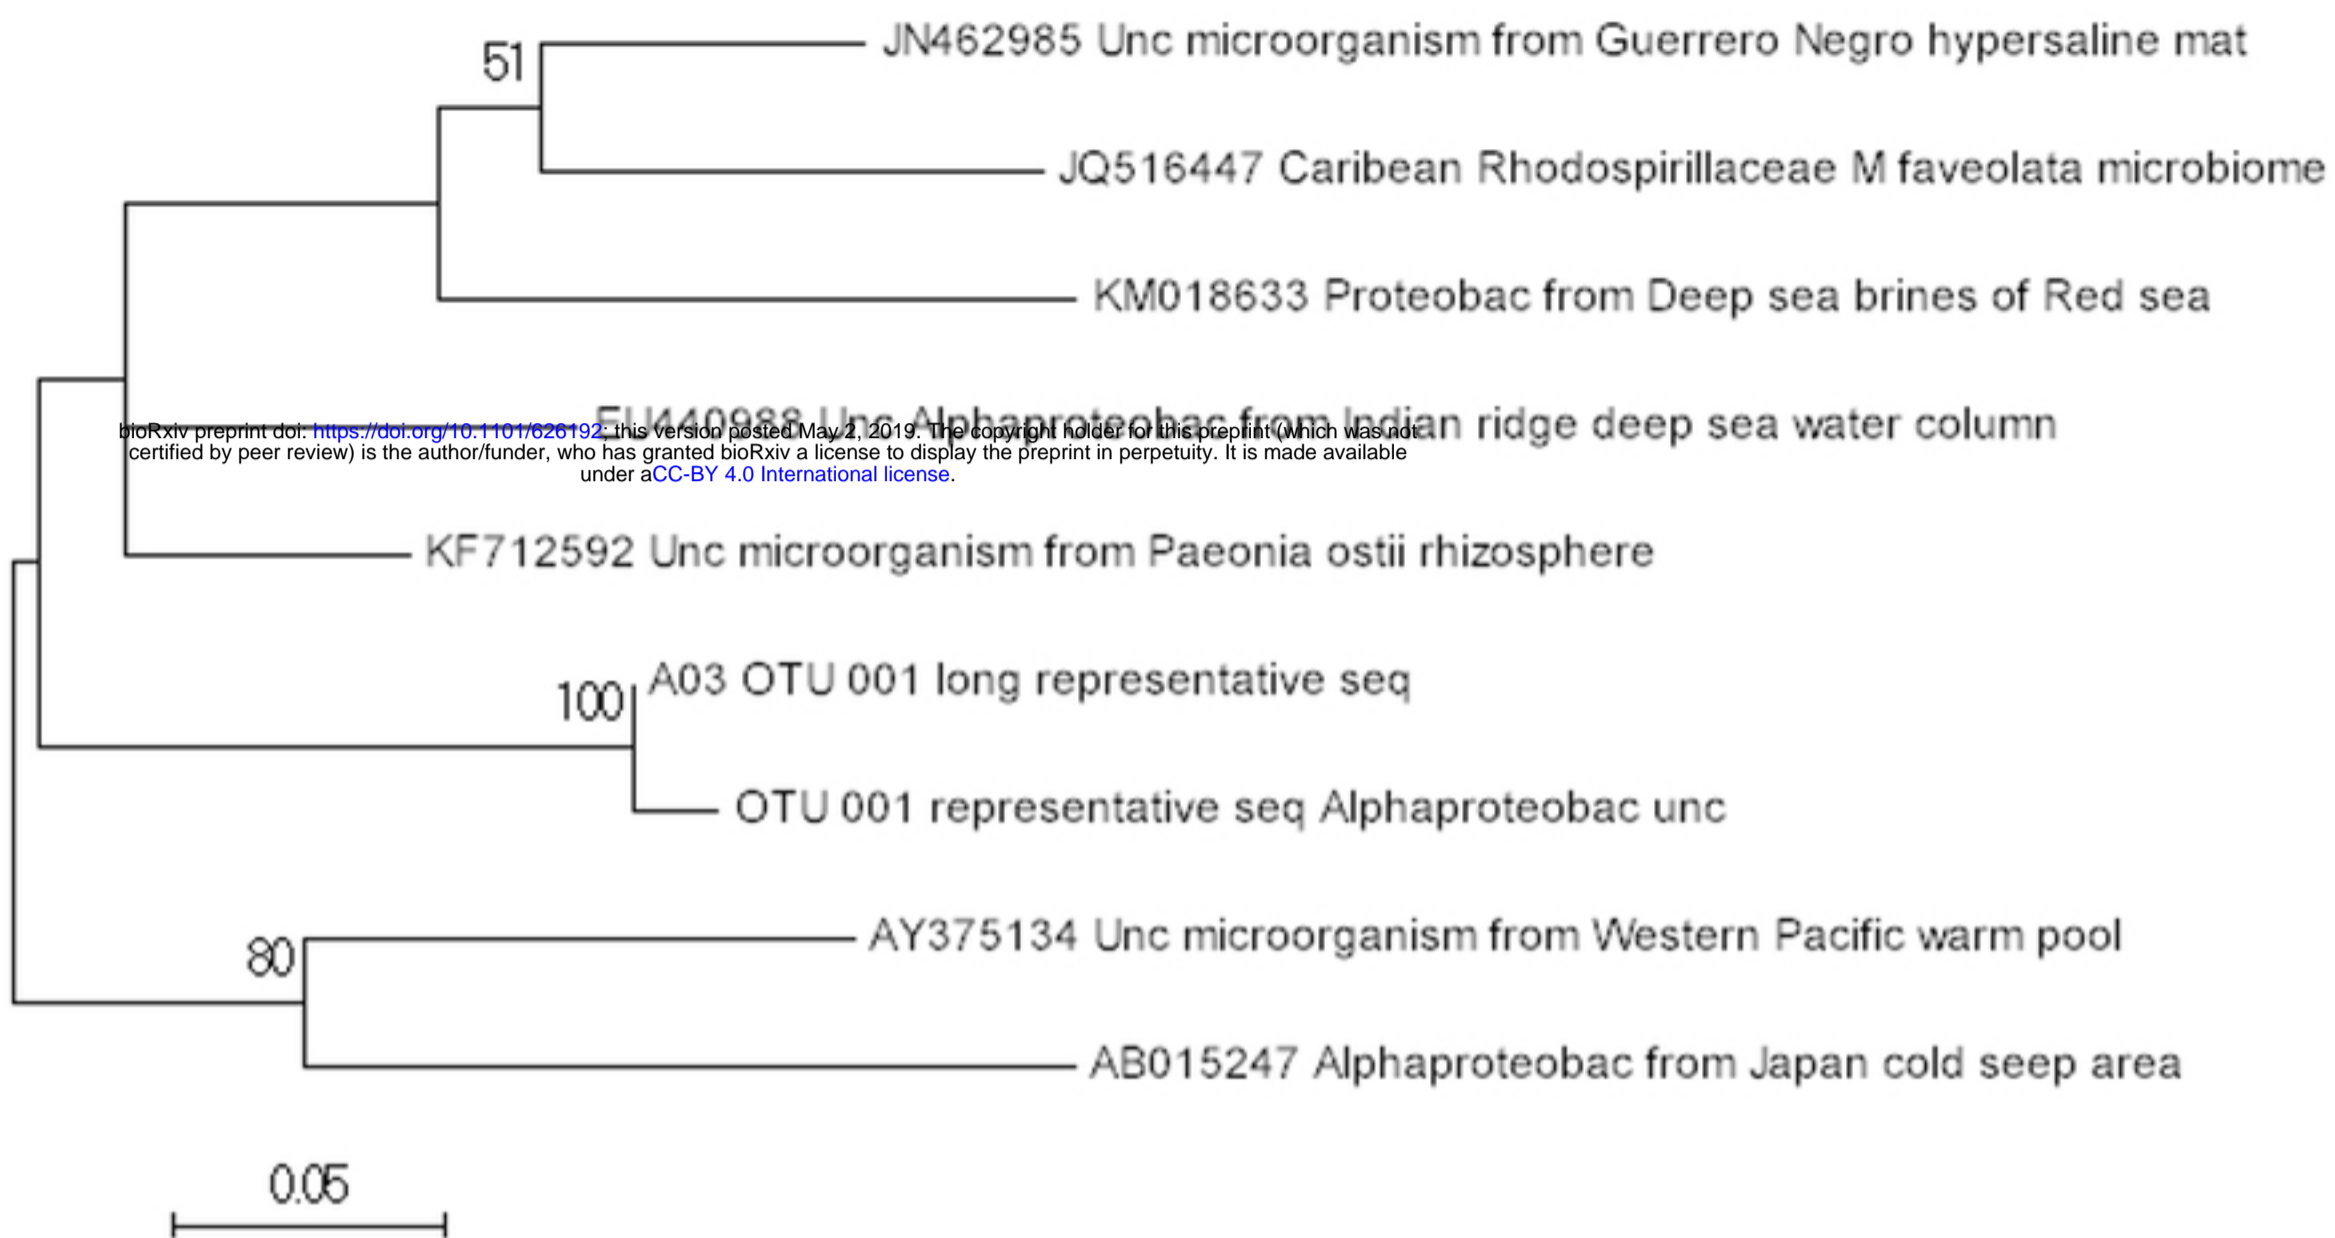**B**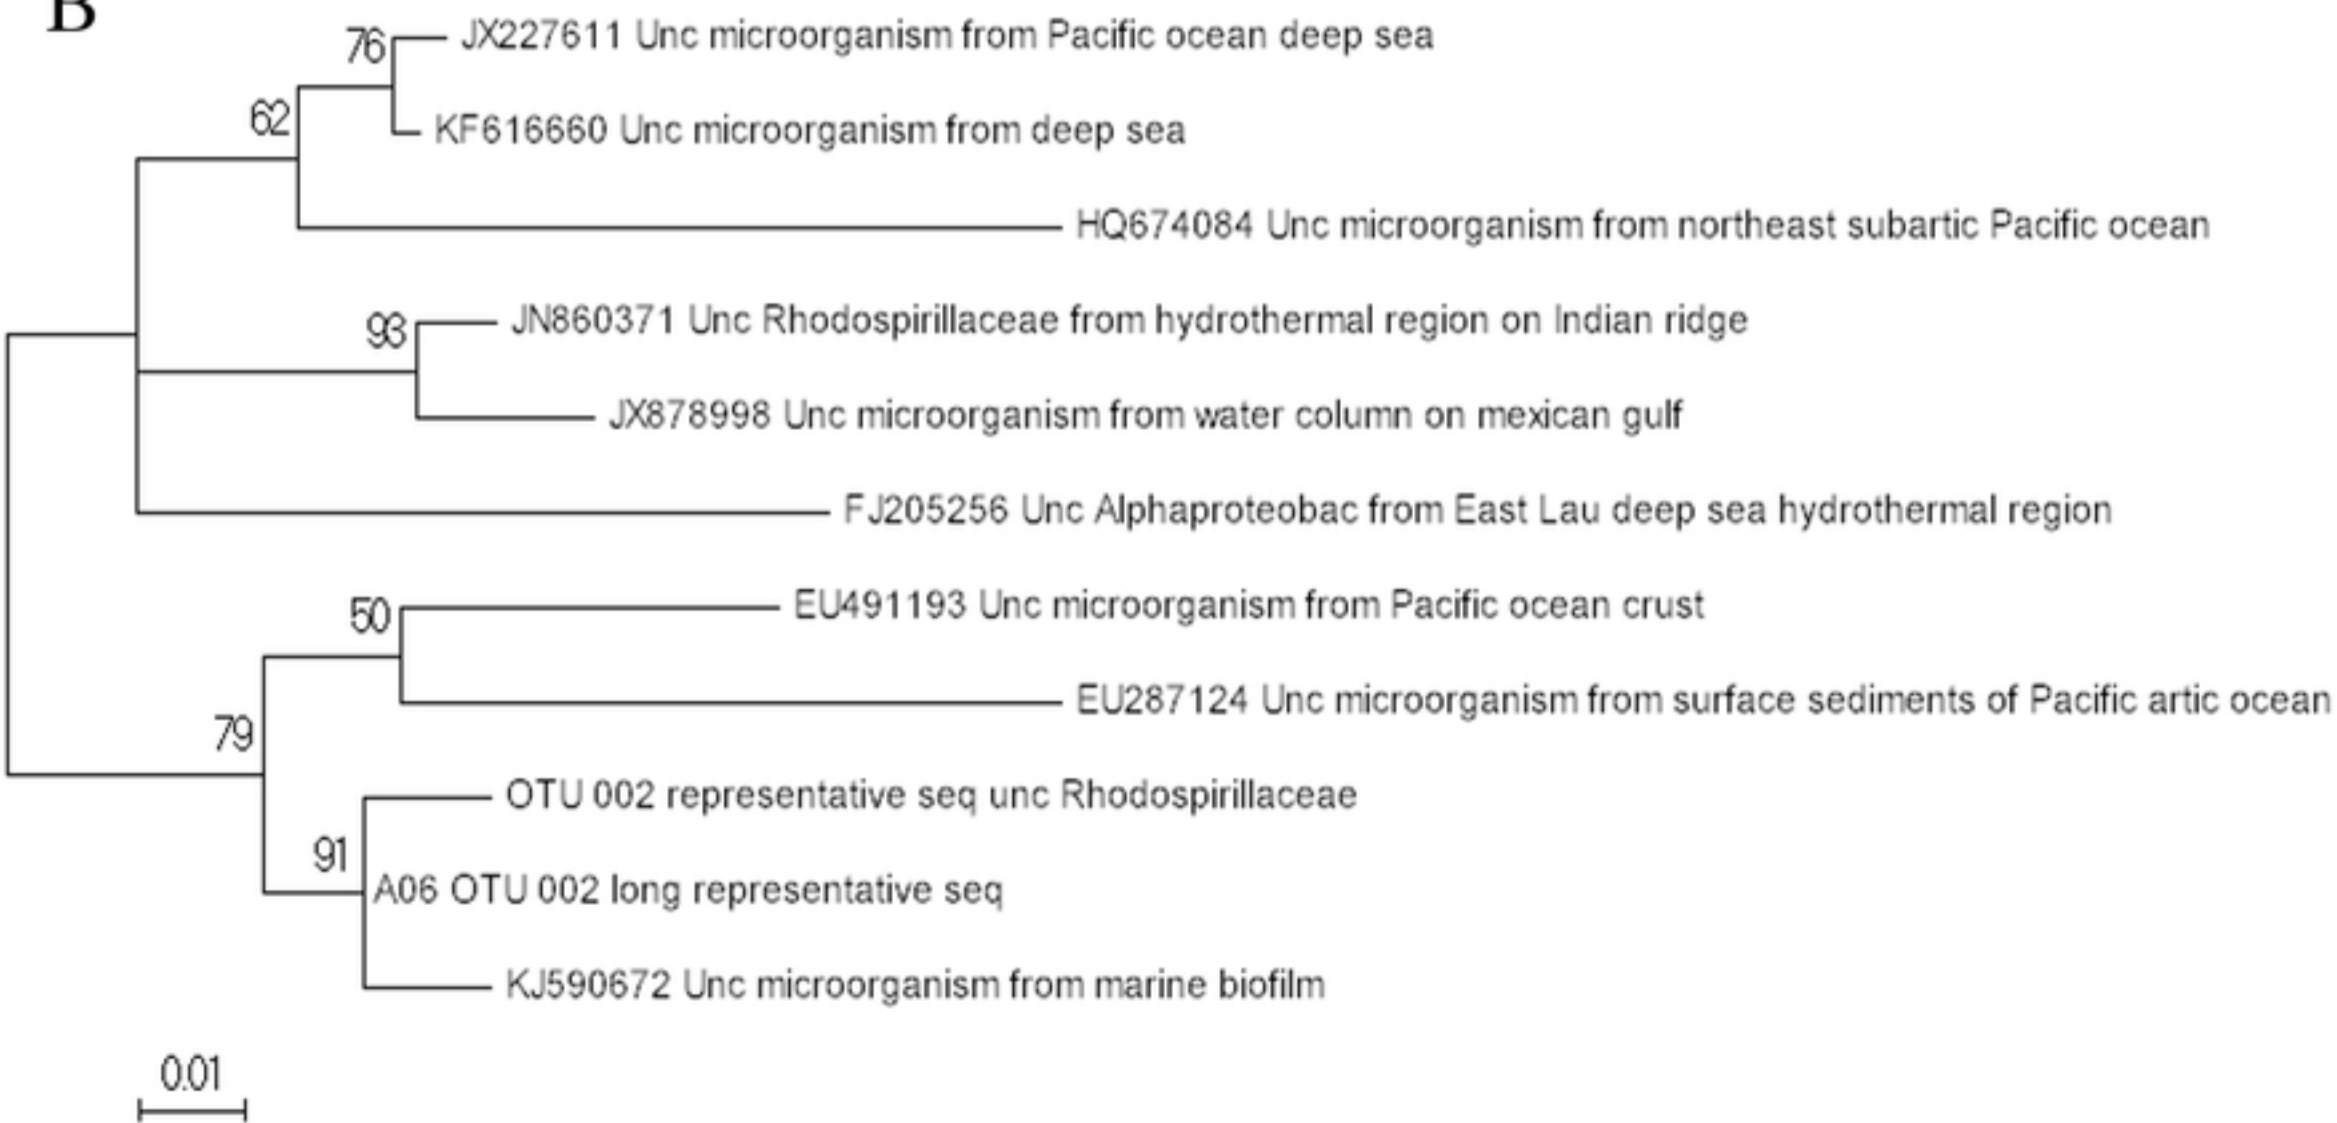**Figure 3**

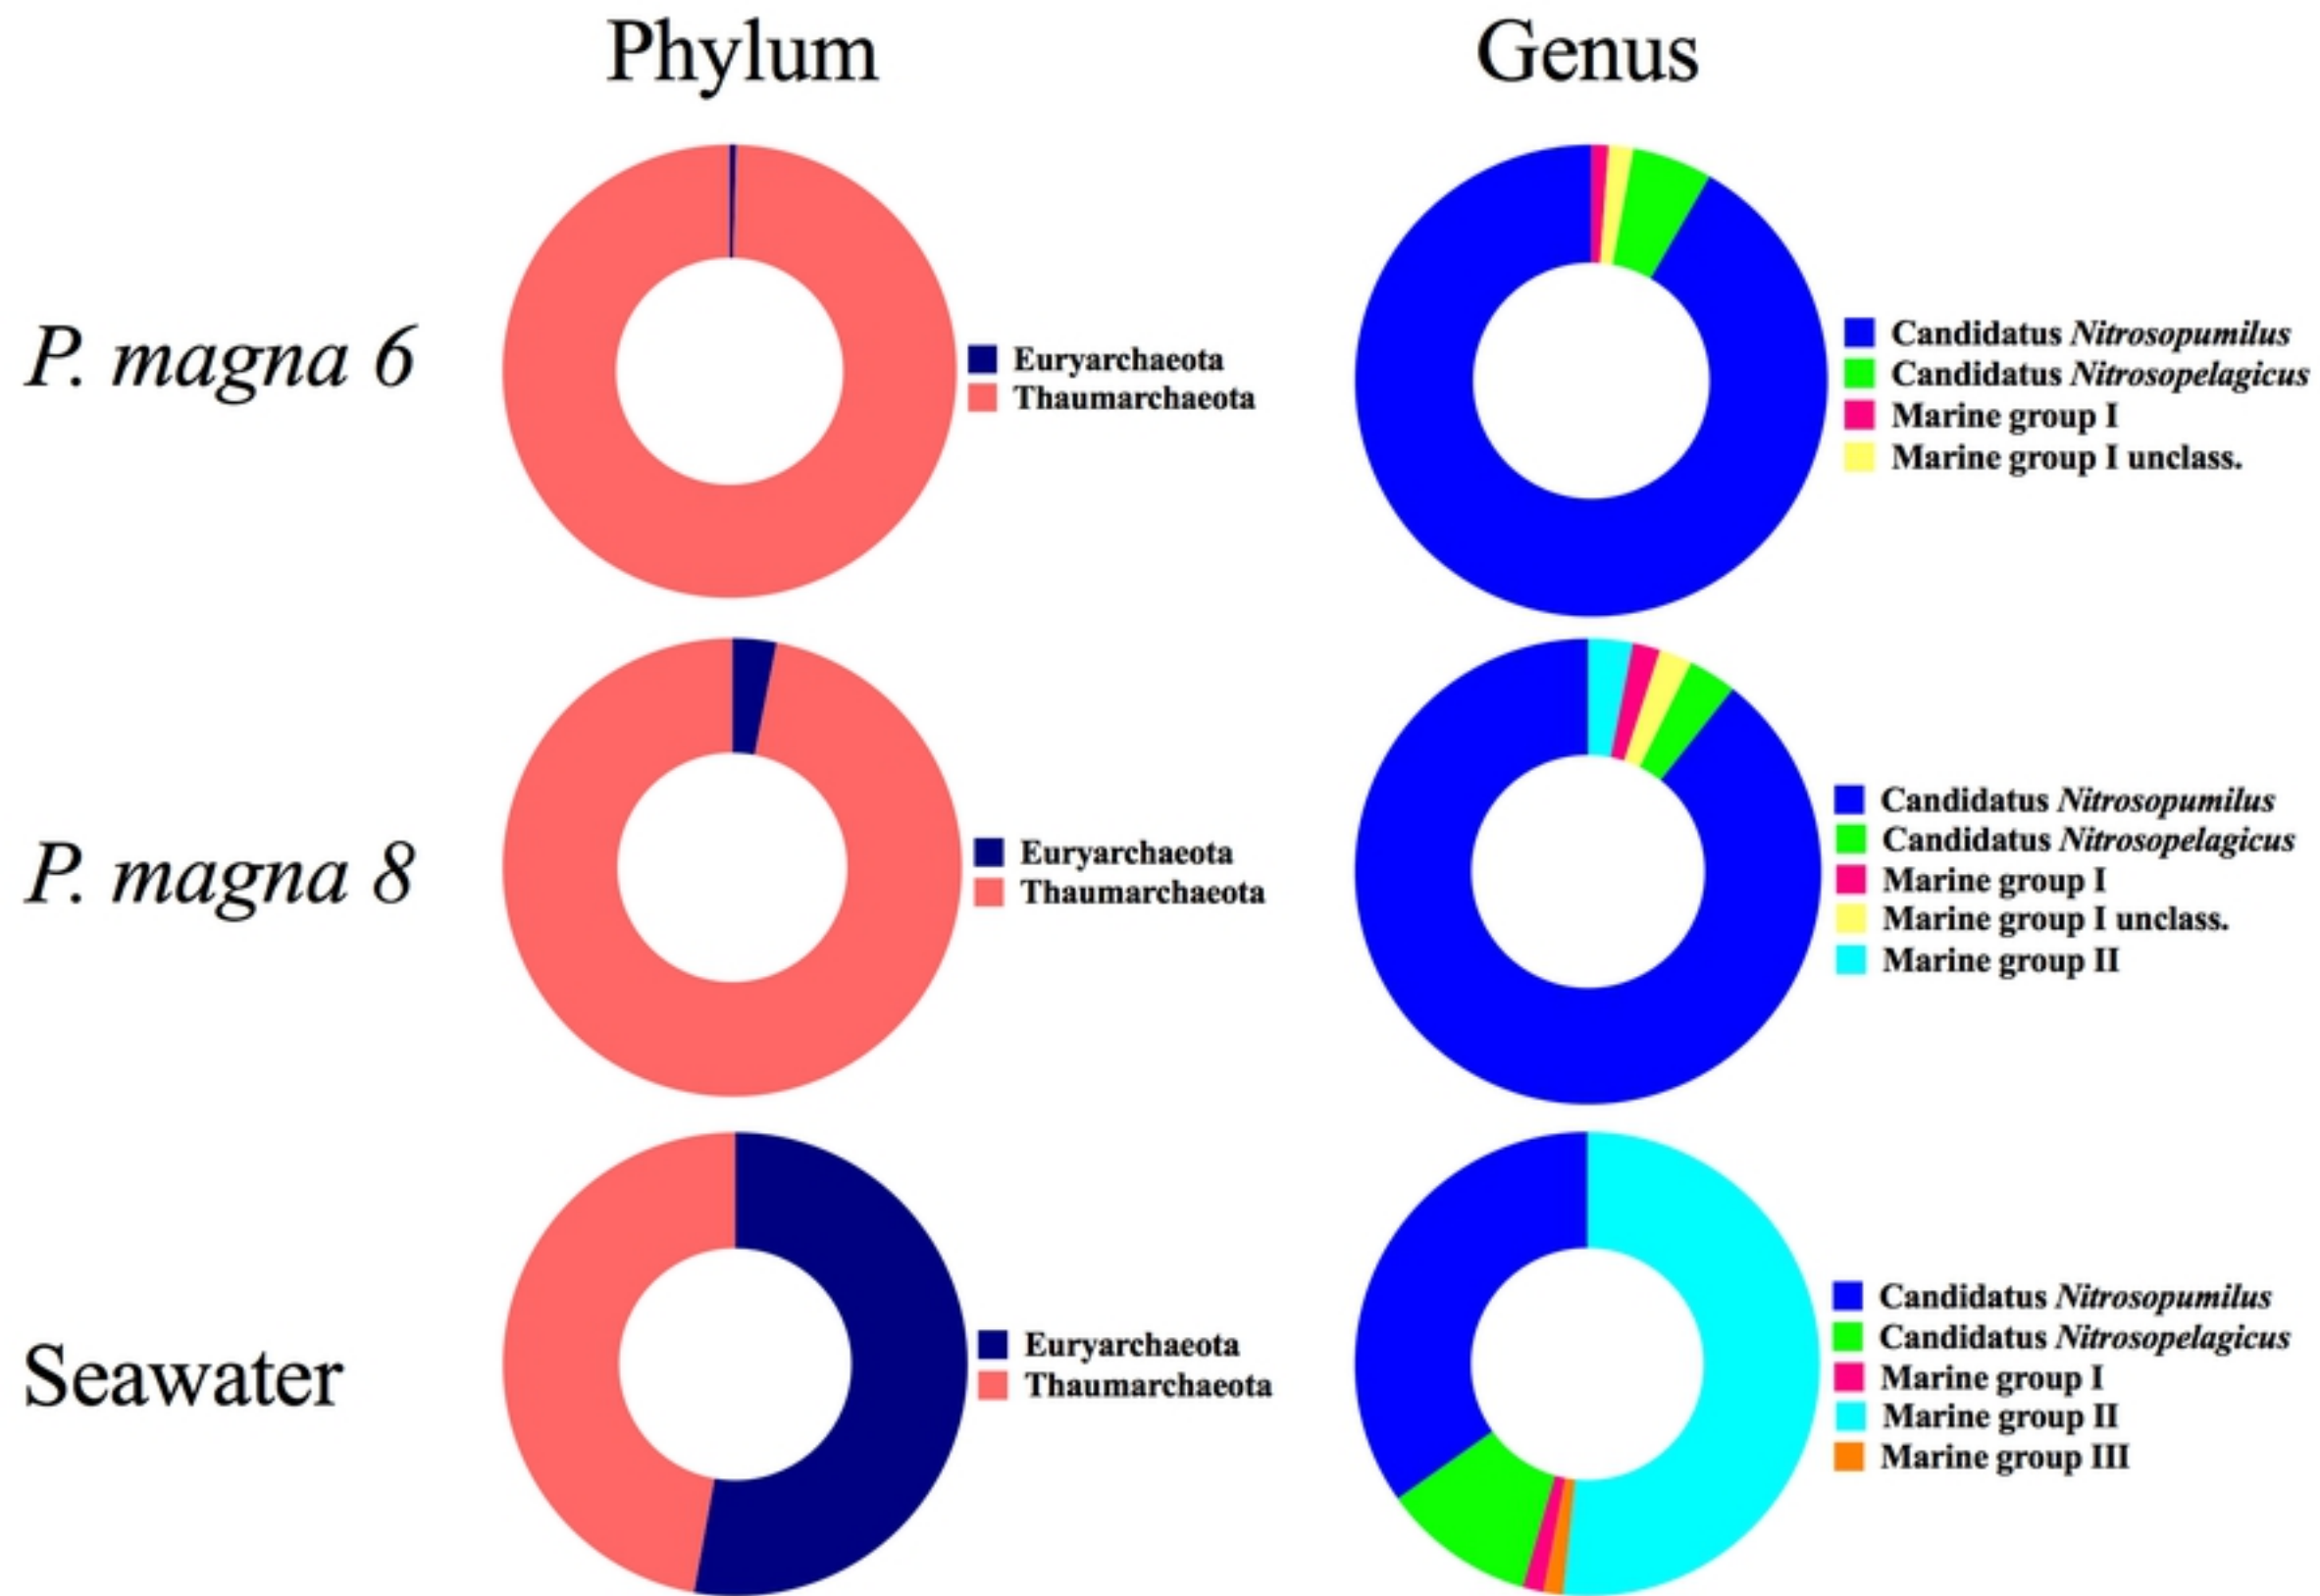

Figure 4

A

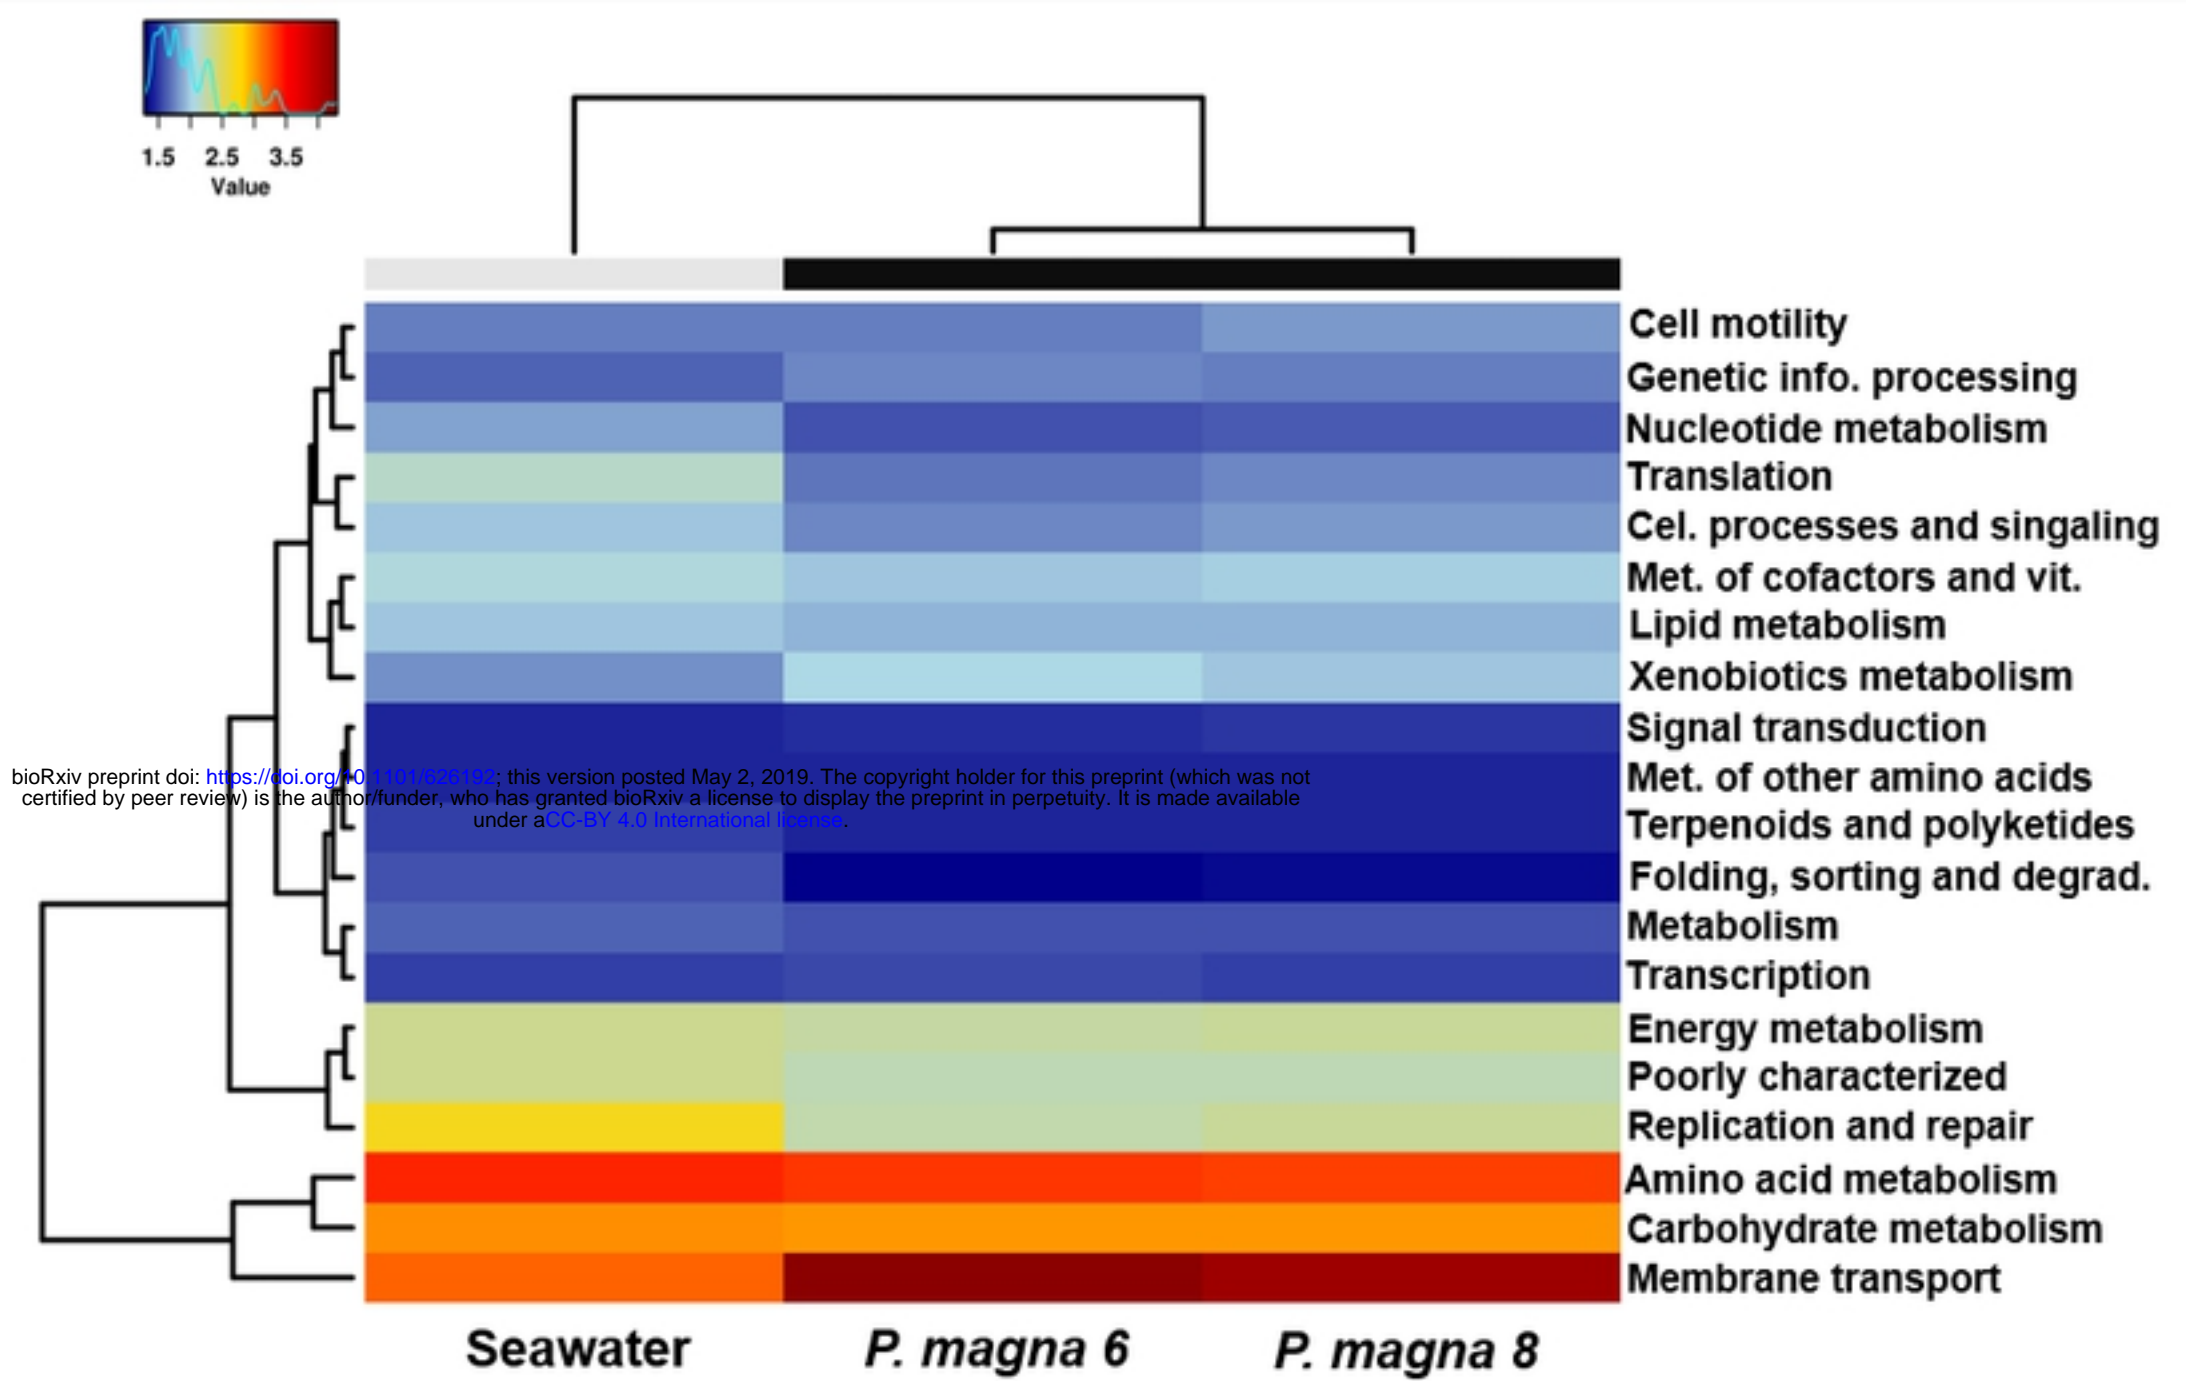

B

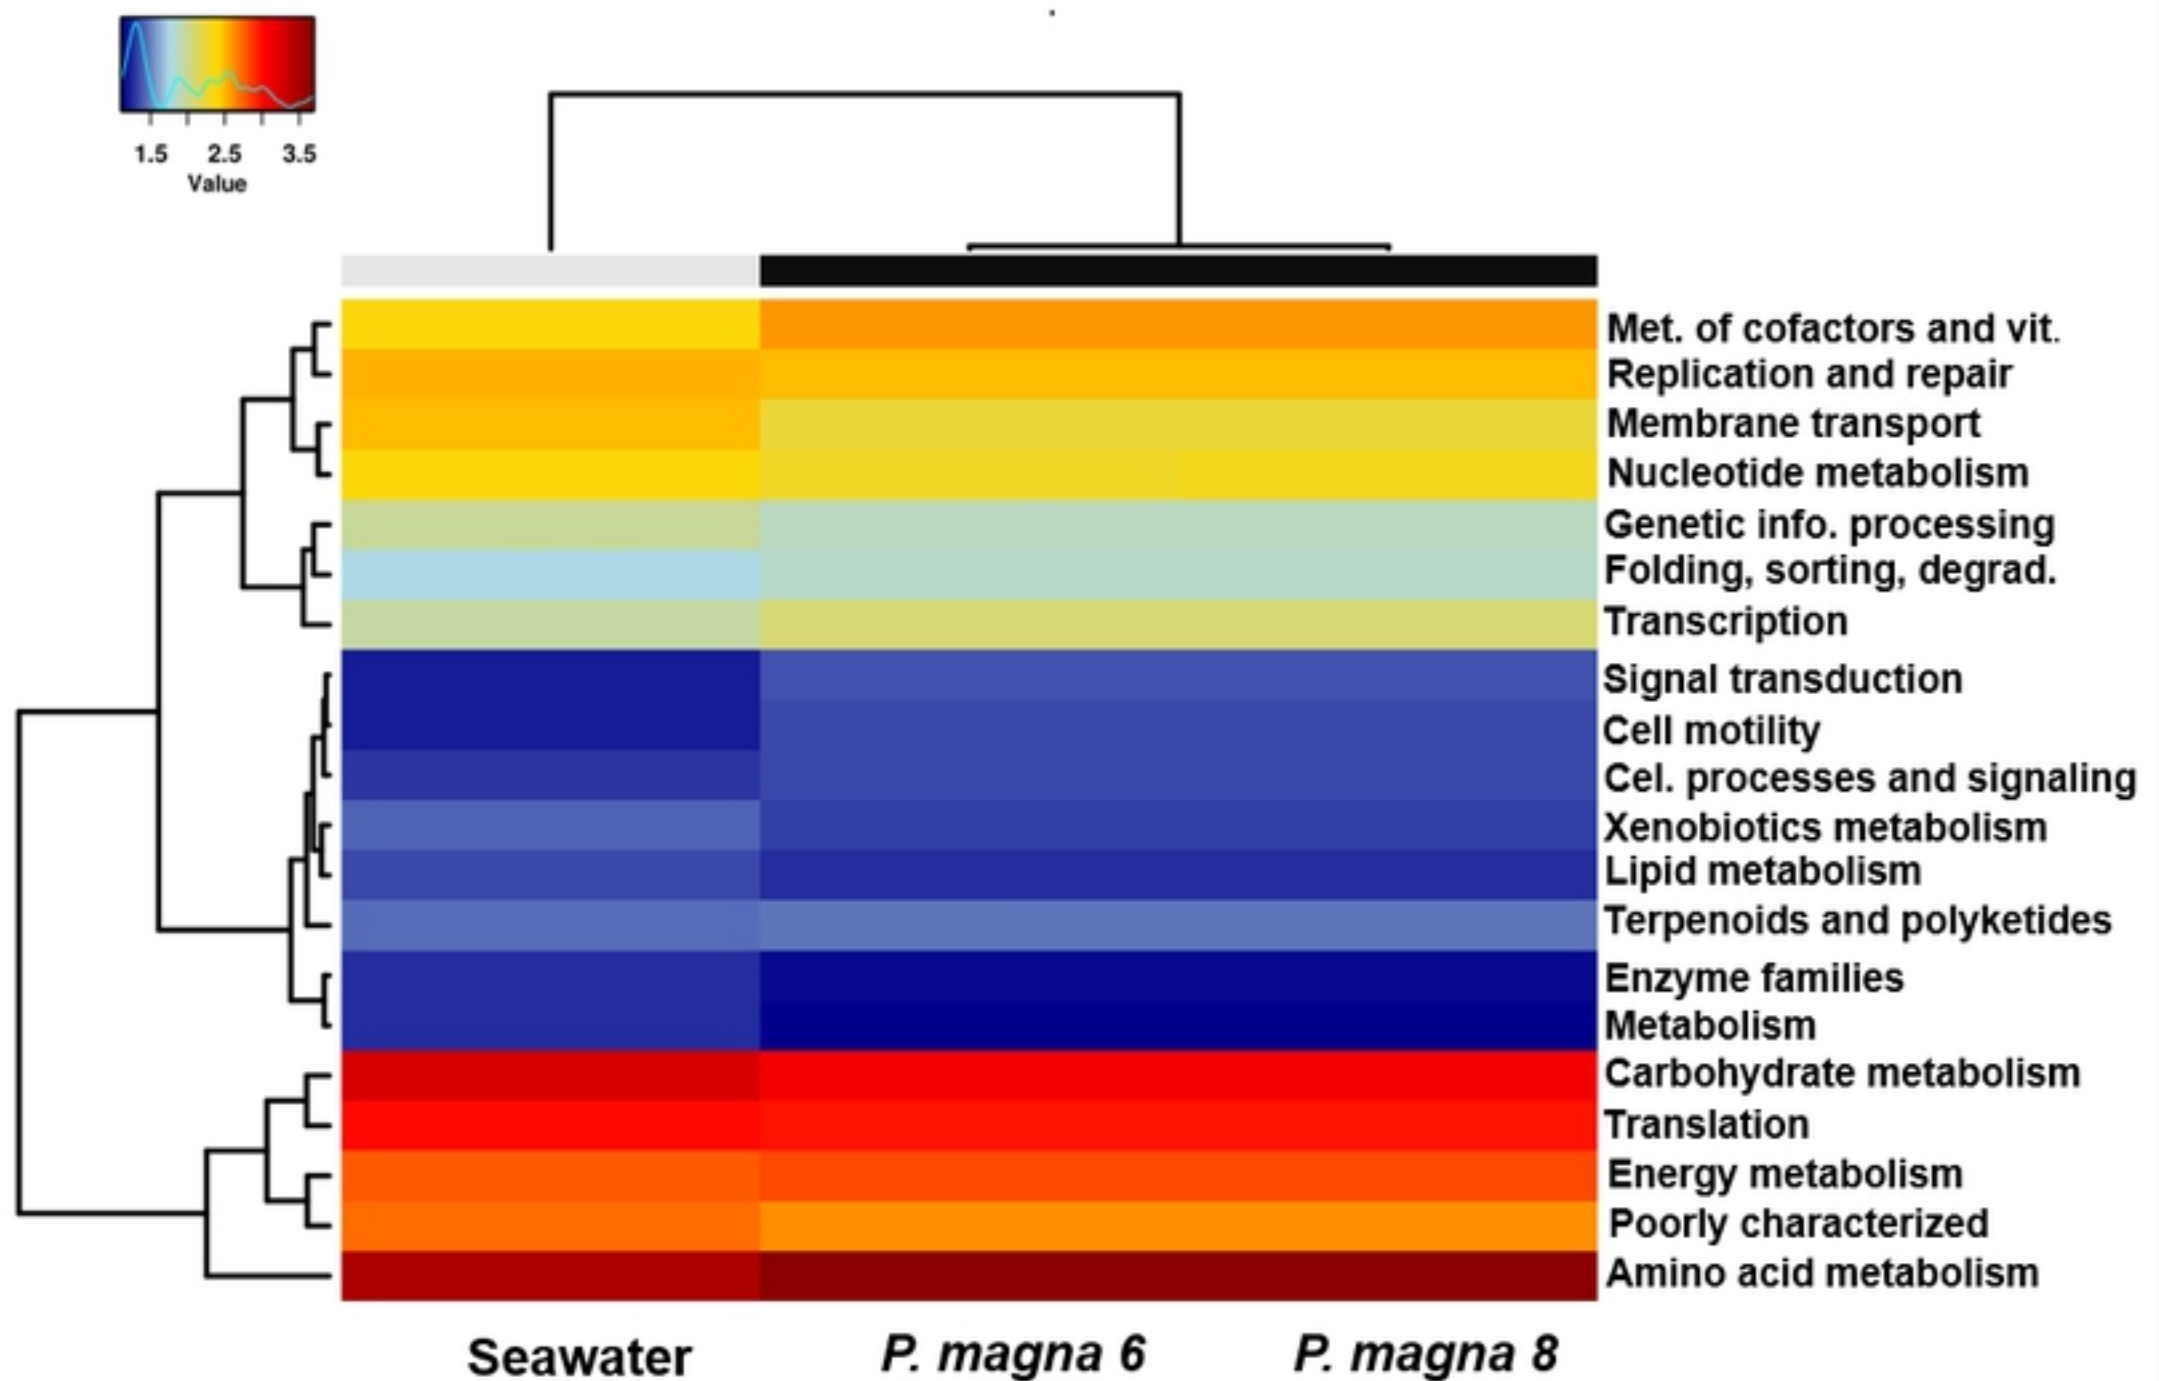

Figure 5

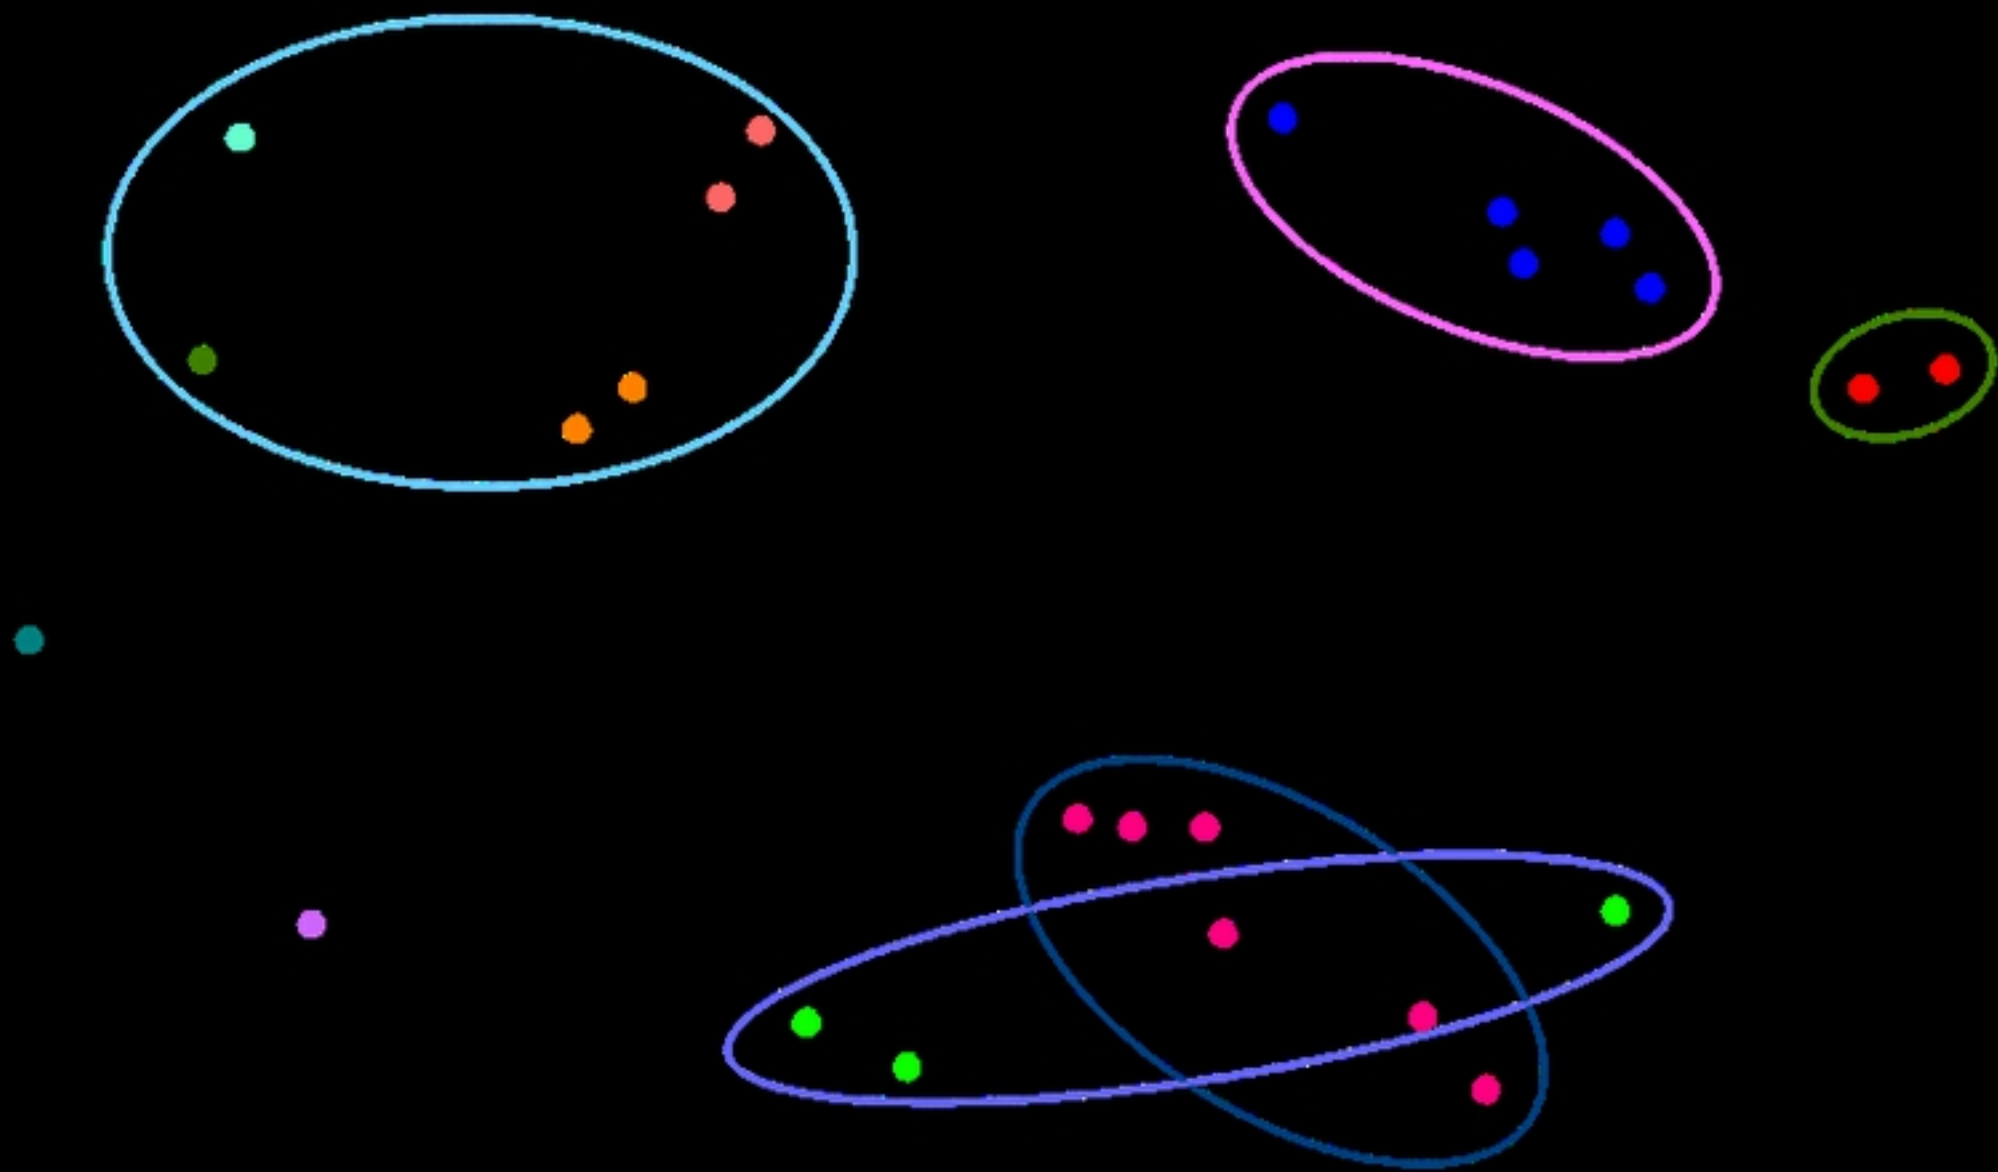

Figure 6



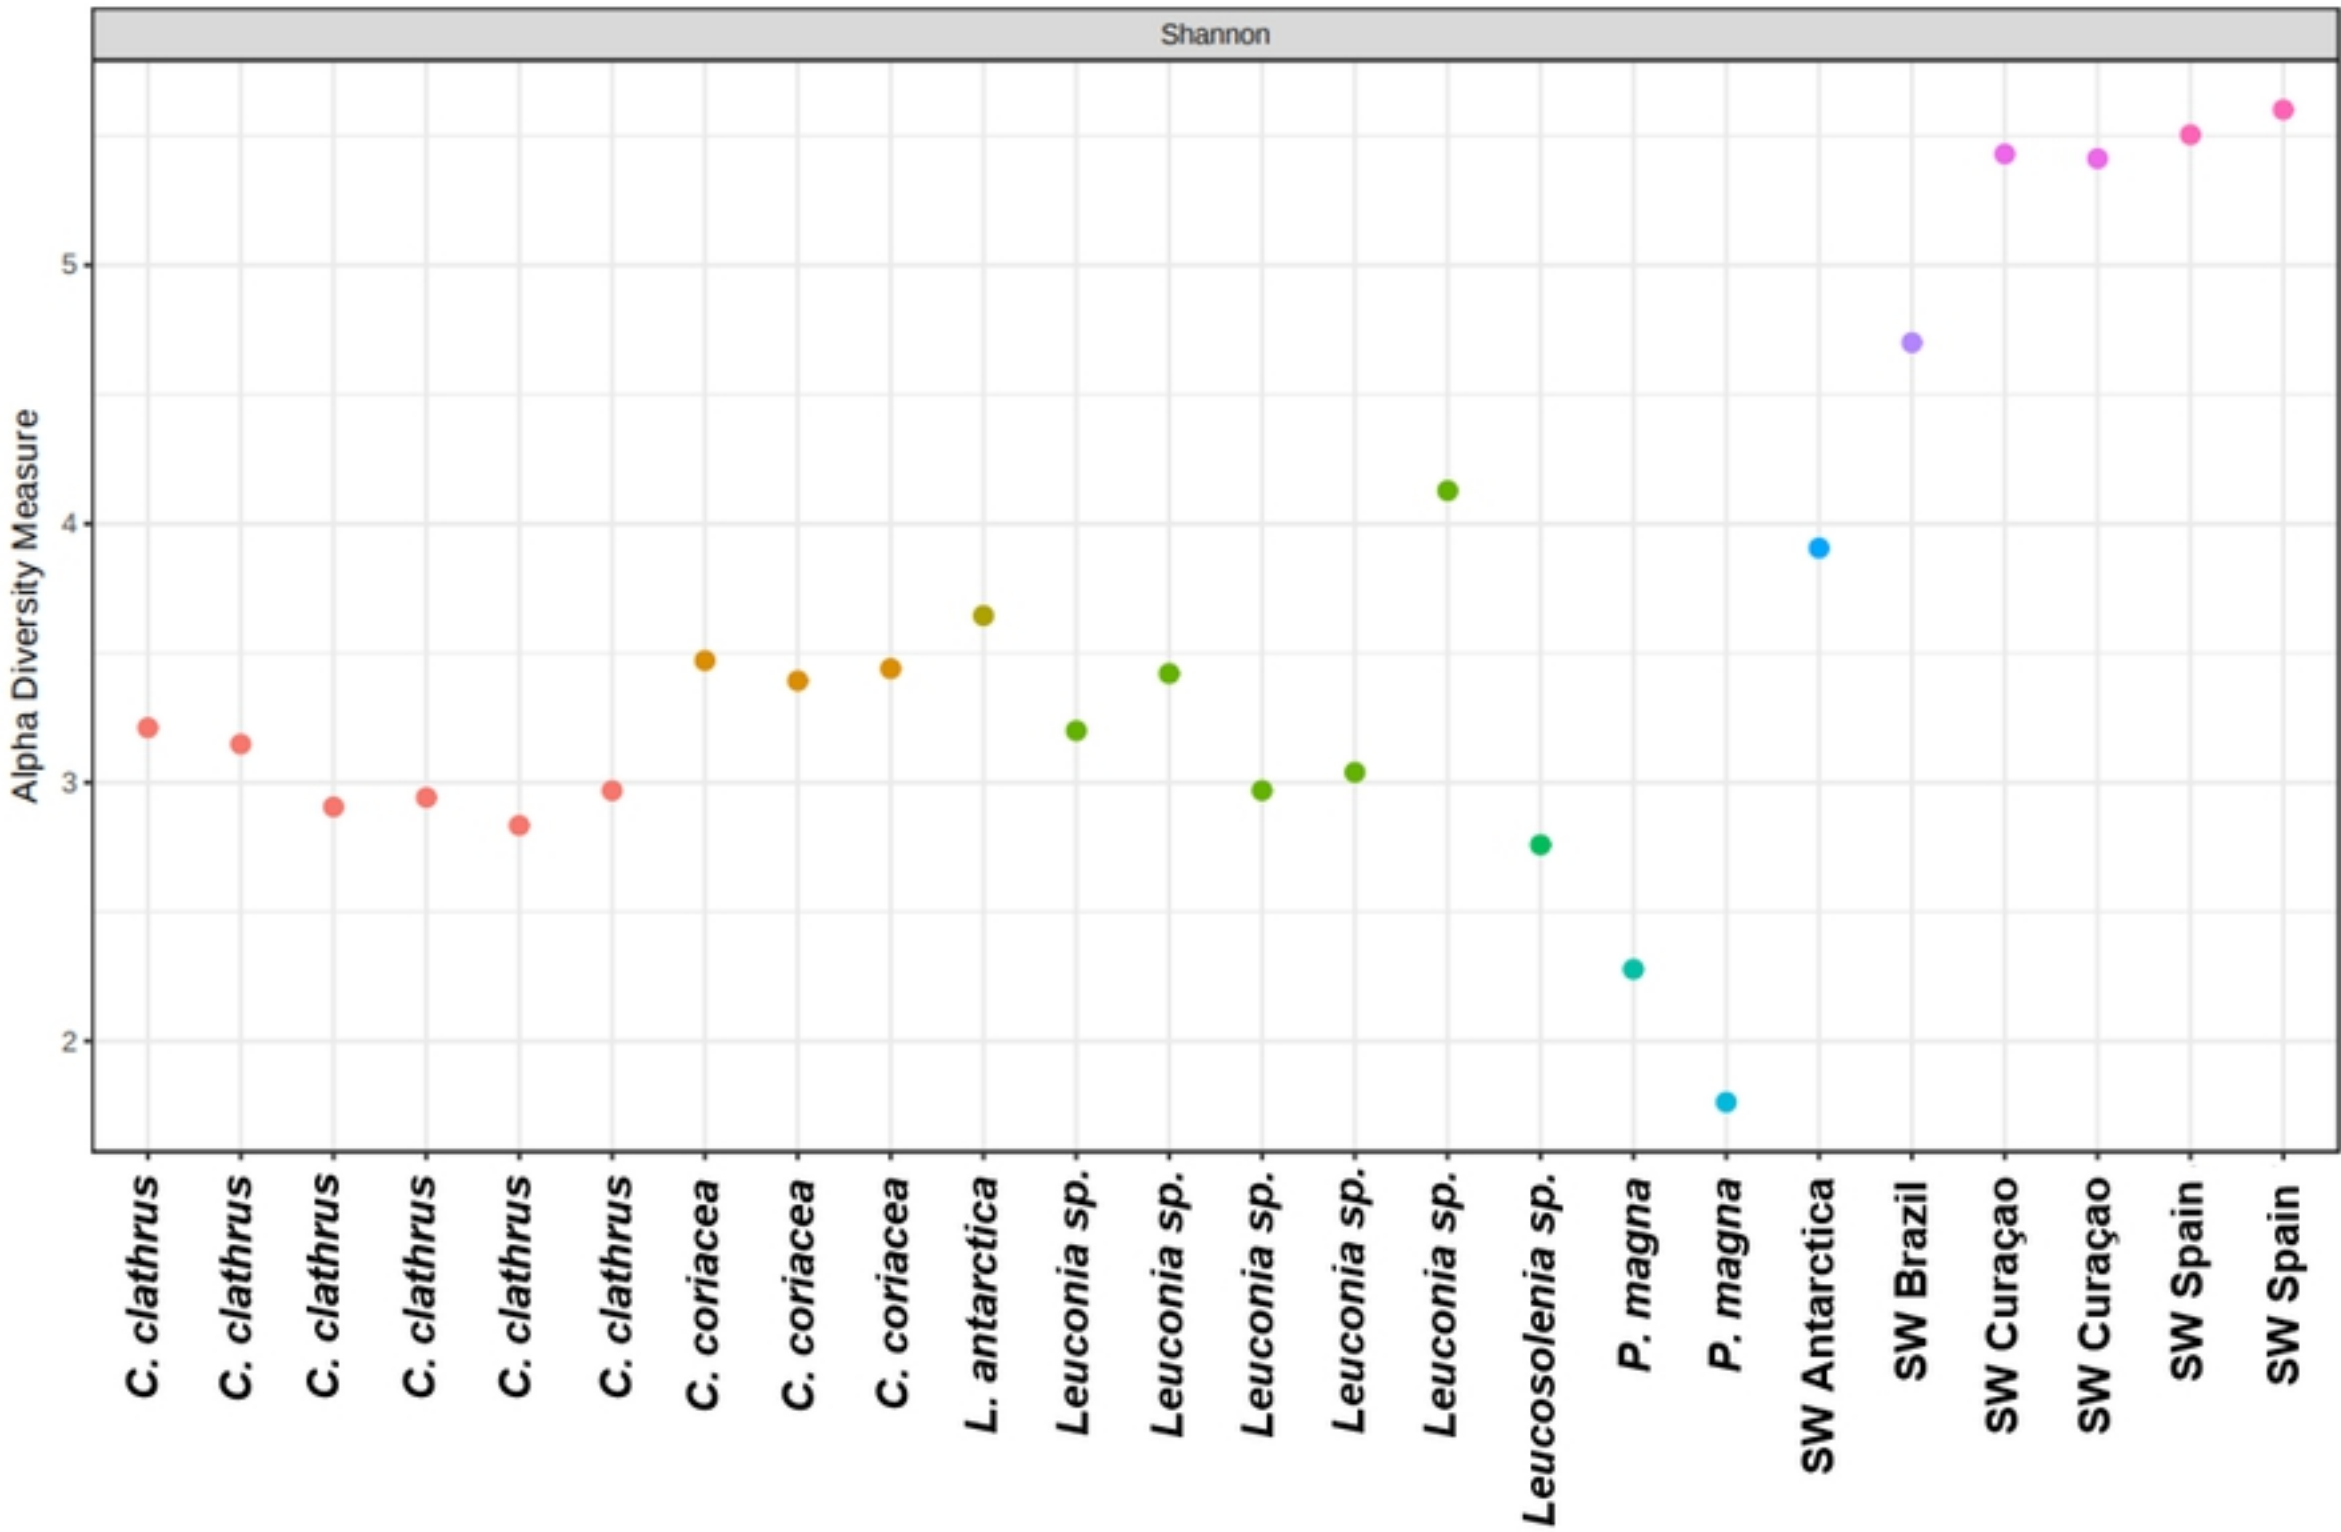

Figure 7

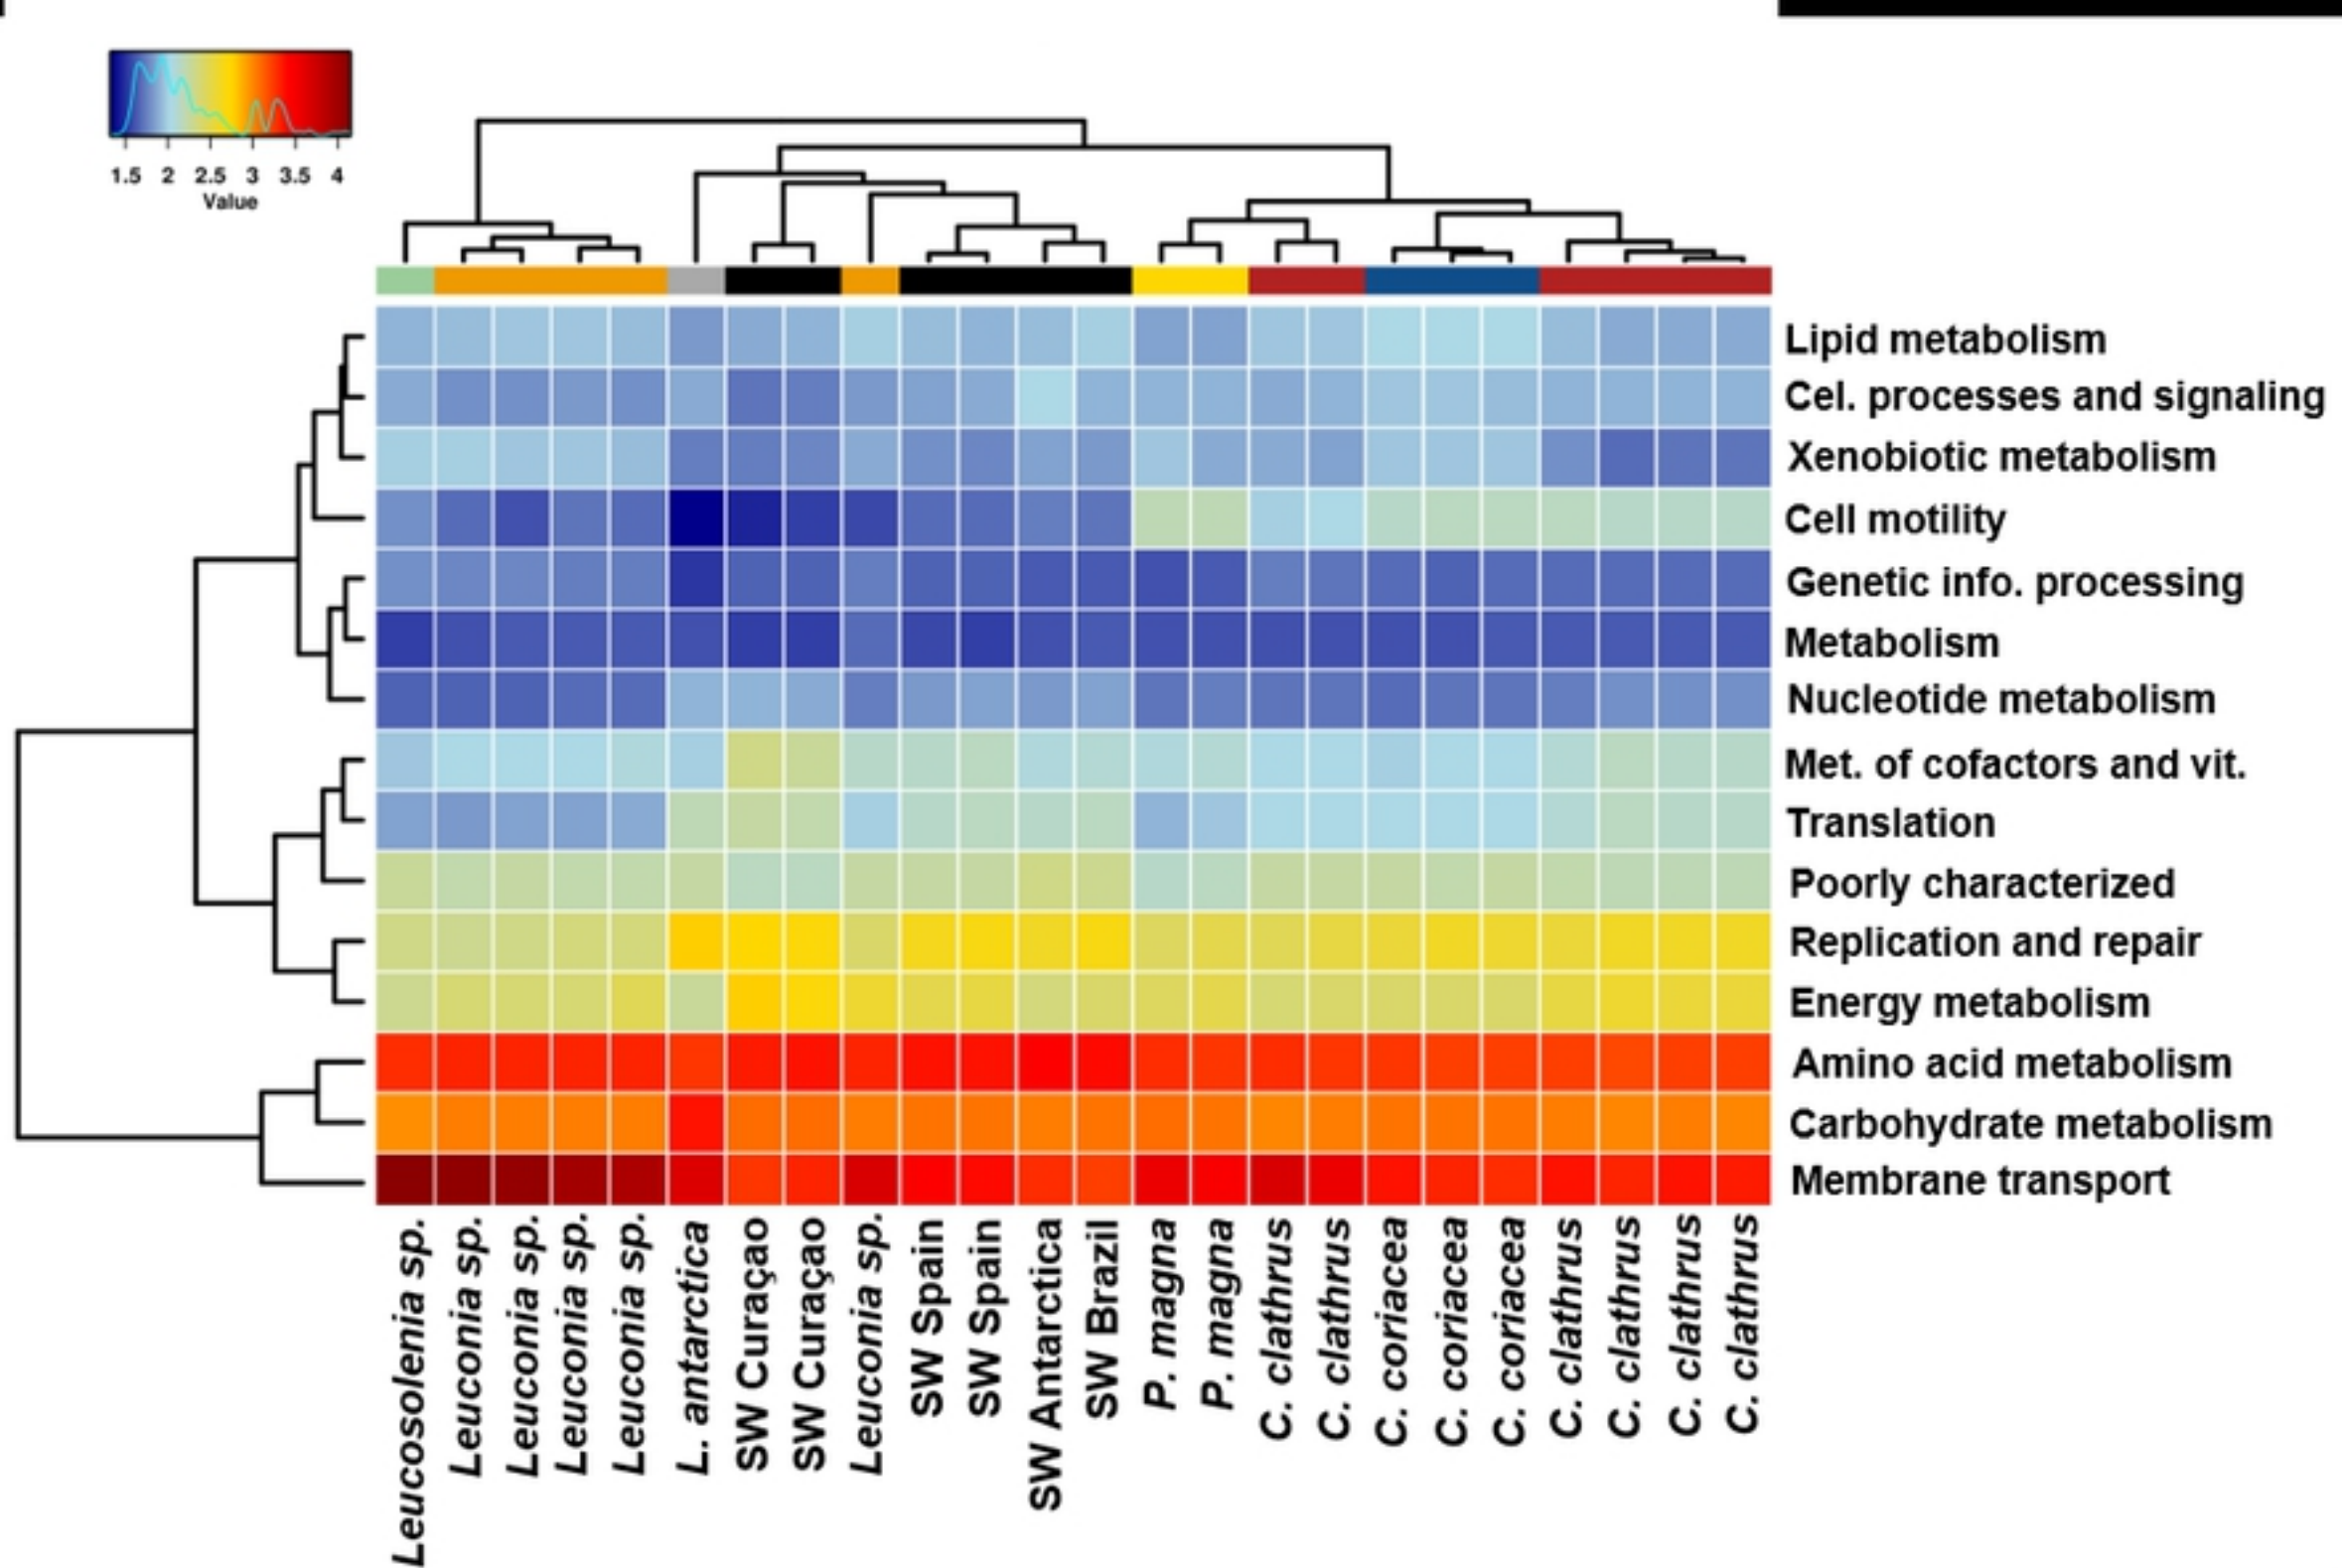

Figure 8

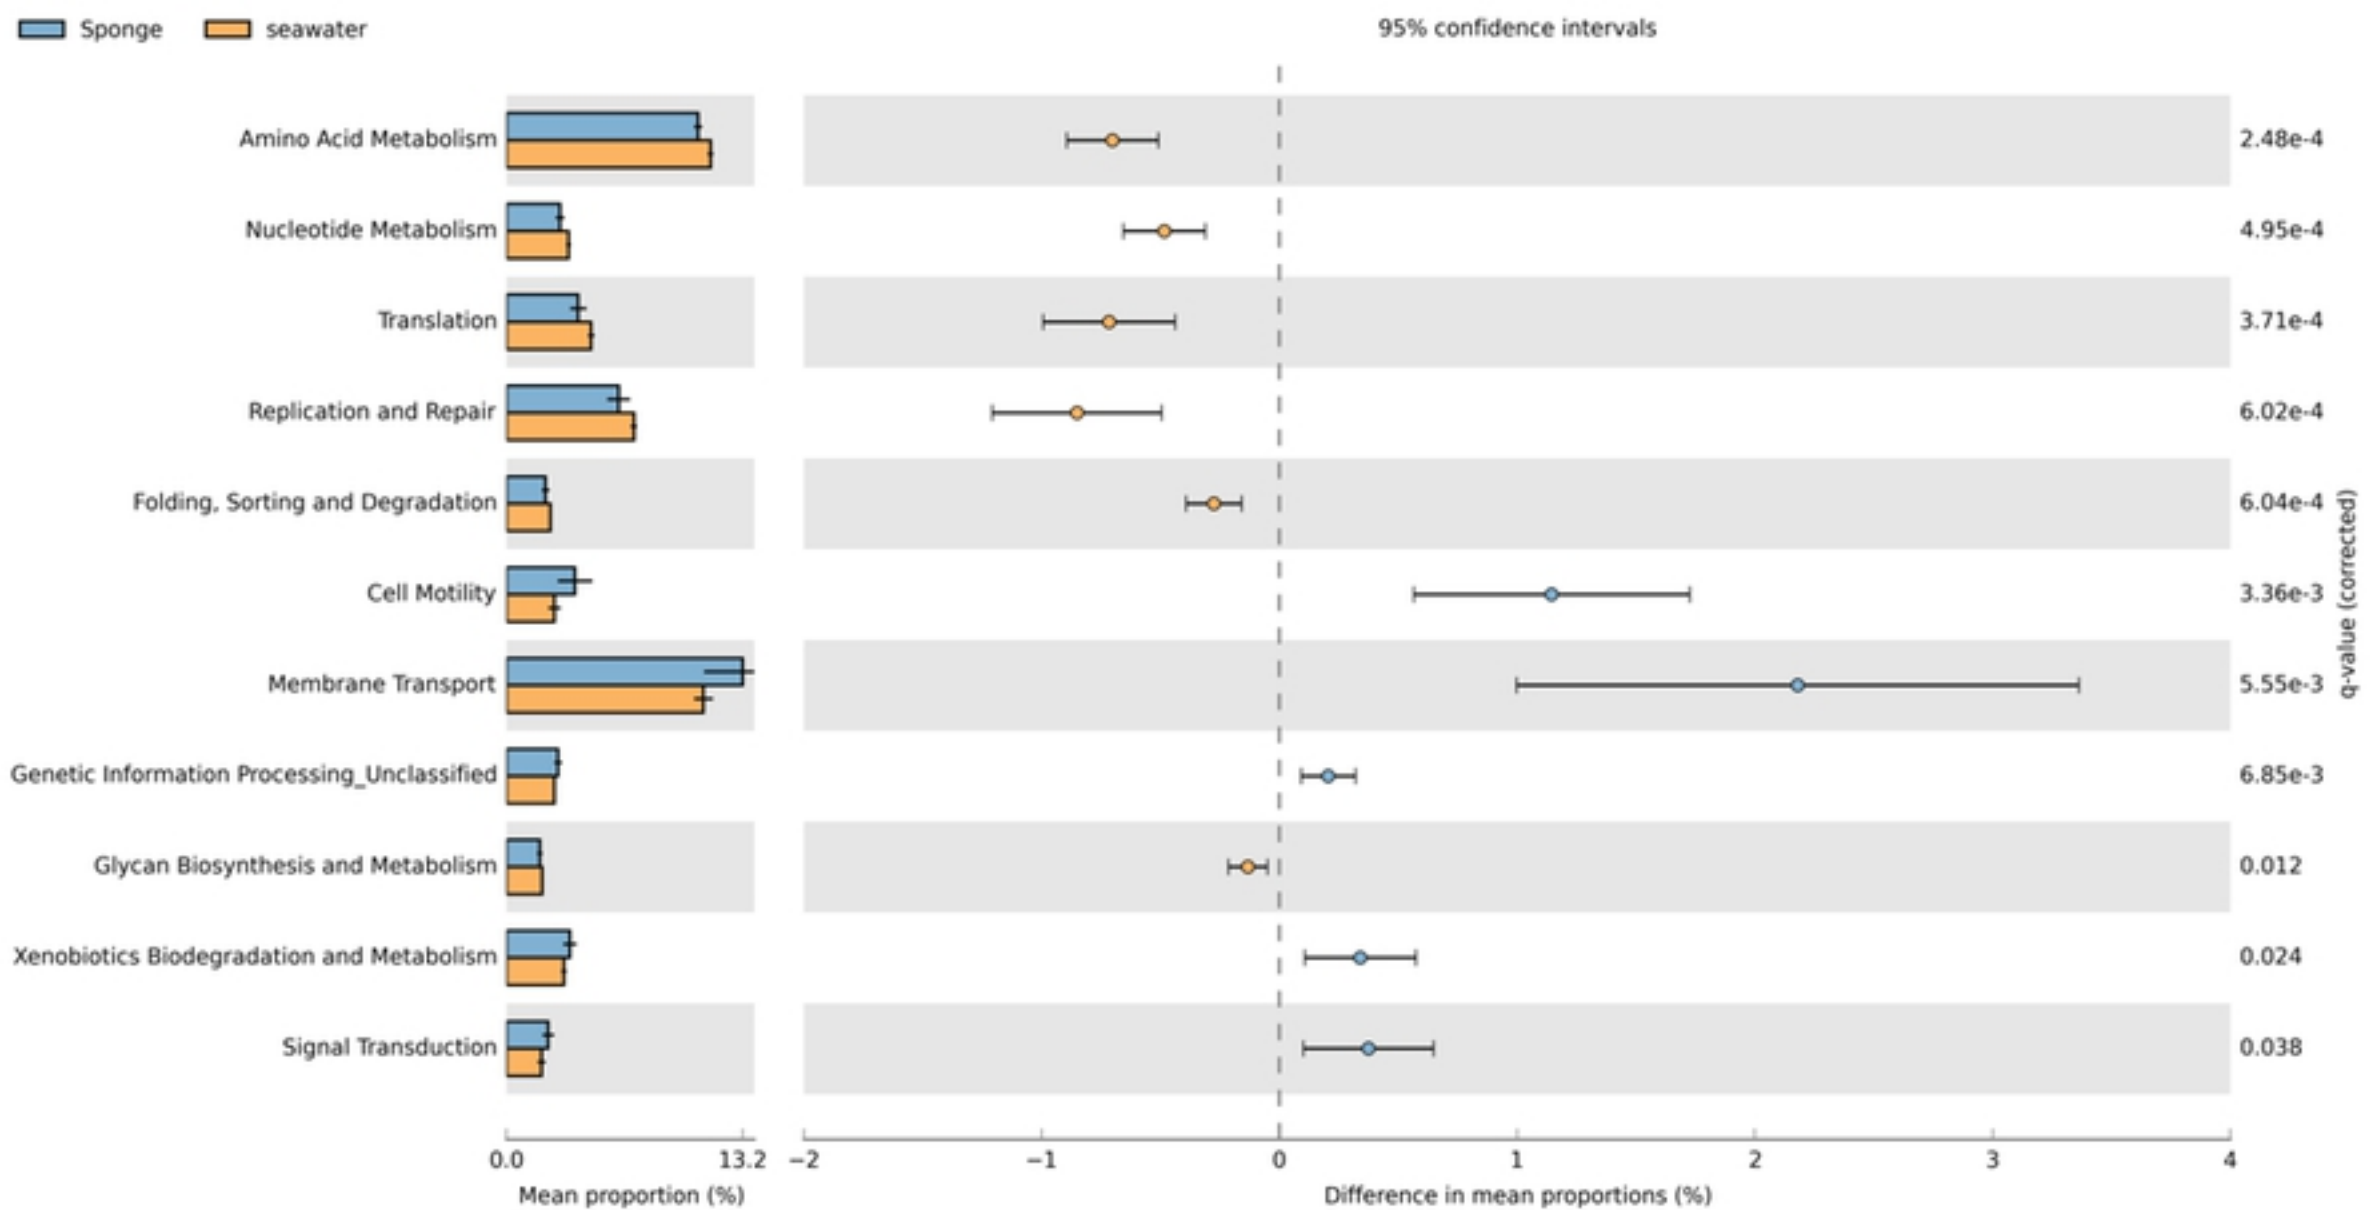

Figure 9
